# Supplementary material for: Improving continence services for older people from the service-providers’ perspective: a qualitative interview study
Source: PubMed Central journal article supplement — BMJ Open. 2013 Jul 29;3(7):e002926. doi: 10.1136/bmjopen-2013-002926 (PMC3731733; doi:10.1136/bmjopen-2013-002926), 2013-07-29
Supplement: bmjopen-2013-002926.draft_revisions.pdf [file bmjopen-2013-002926.draft_revisions.pdf]

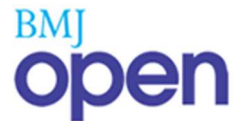

**Improving continence services for older people from the service-providers' perspective: a qualitative interview study**

|                                 |                                                                                                                                                                                                                                                                                                                                                                                                         |
|---------------------------------|---------------------------------------------------------------------------------------------------------------------------------------------------------------------------------------------------------------------------------------------------------------------------------------------------------------------------------------------------------------------------------------------------------|
| Journal:                        | <i>BMJ Open</i>                                                                                                                                                                                                                                                                                                                                                                                         |
| Manuscript ID:                  | bmjopen-2013-002926                                                                                                                                                                                                                                                                                                                                                                                     |
| Article Type:                   | Research                                                                                                                                                                                                                                                                                                                                                                                                |
| Date Submitted by the Author:   | 21-Mar-2013                                                                                                                                                                                                                                                                                                                                                                                             |
| Complete List of Authors:       | Orrell, Alison; University of Sheffield, School of Health and Related Research<br>McKee, Kevin; Dalarna University, School of Health and Social Studies<br>Dahlberg, Lena; Dalarna University, School of Health and Social Studies<br>Gilhooly, Mary; Brunel University, School of Health Science and Social Care<br>Parker, Stuart; University of Sheffield, Sheffield Institute for Studies on Ageing |
| <b>Primary Subject Heading</b>: | Geriatric medicine                                                                                                                                                                                                                                                                                                                                                                                      |
| Secondary Subject Heading:      | Health services research, Qualitative research, Urology                                                                                                                                                                                                                                                                                                                                                 |
| Keywords:                       | Urinary incontinences < UROLOGY, Quality in health care < HEALTH SERVICES ADMINISTRATION & MANAGEMENT, GERIATRIC MEDICINE                                                                                                                                                                                                                                                                               |
|                                 |                                                                                                                                                                                                                                                                                                                                                                                                         |

SCHOLARONE™  
Manuscripts

1  
2  
3 **Improving continence services for older people from the service-providers' perspective: a**  
4 **qualitative interview study**  
5  
6  
7

8 **Abstract**  
9

10 **Objective** To examine in depth the views and experiences of continence service leads in England on  
11 key service and continence management characteristics that target effective treatment outcomes for  
12 older people.  
13

14 **Design** Qualitative semi-structured interviews using purposive sample recruited across 16 continence  
15 services.  
16  
17

18 **Setting** Three acute and 13 primary care National Health Service Trusts in England.  
19

20 **Participants** Sixteen continence service leads in England actively treating and managing older people  
21 with urinary incontinence (UI).  
22  
23

24 **Results** Participants highlighted a failure on the part of commissioners, managers and other health  
25 professionals in recognising the problem of UI and in acknowledging the importance of continence for  
26 older people. Patient assessment and continence promotion regardless of age, rather than pad  
27 provision, were identified as key issues for delivering effective treatment outcomes for older people  
28 with UI. To achieve this, the primary response by commissioners and other health professionals is to  
29 improve attitudes towards continence and older people. This, coupled with more rapid and  
30 appropriate patient referral pathways, investment in service capacity, e.g. more trained staff, and  
31 strengthened inter-service collaborations and a higher profile within medical and nurse training were  
32 specified as being important for delivering an equitable and high quality continence service.  
33  
34  
35  
36  
37  
38  
39

40 **Conclusions** Improving attitudes towards continence and older people, together with strengthened  
41 inter-service collaborations, may lead to the raising of standards in continence care for older people  
42 with UI.  
43  
44  
45  
46  
47  
48  
49  
50  
51  
52  
53  
54  
55  
56  
57  
58  
59  
60

## Article Summary

### Article focus

- Urinary incontinence affects both men and women, but the quality of continence care provided is worse for patients aged 65 years and over compared to younger patients.
- To explore the views and experiences of continence service leads in England in order to identify and to gain information about the key service and continence management characteristics needed to deliver effective treatment outcomes for older people with UI.

### Key messages

- Patient assessment and continence promotion regardless of age, rather than pad provision are the key issues for delivering effective treatment outcomes for older people with UI.
- Improving attitudes towards continence and older people, together with more rapid and appropriate patient referral pathways, strengthened inter-service collaborations, investment in service capacity and a higher profile of UI within medical and nurse training may lead to the raising of standards in continence care for older people with urinary incontinence.

### Strengths and limitations

- This study directly asked continence service leads in England to identify key features of a high quality and efficacious continence service for older people with urinary incontinence.
- Our sampling strategy ensured a good representation of participants and the use of qualitative interviews was the optimal method for this study as it allowed participants to discuss in detail and to express openly their opinions.
- Data were only collected in England as healthcare in Wales, Scotland and Northern Ireland is devolved and has no internal market. Hence the study has a limited contribution to the debate on continence management in these areas of the UK.

## INTRODUCTION

Urinary incontinence (UI) is a common condition that affects both men and women. It is estimated that in the United Kingdom (UK) approximately 1.1 million women and 400,000 men have UI [1]. The condition can have a substantial impact on the physical, psychological, social and economic well-being of the affected individual and their families [2-4], as UI symptoms are associated with significant morbidity and an increased risk of hospitalisation and admission to institutional care [5, 6].

Furthermore, negative attitudes towards older age (e.g. burden on society) and UI (e.g. distaste) are common in both society and health care, and impact on the provision of health care services [7].

Direct costs of UI to the National Health Service (NHS) are reported to be greater than those associated with chronic common illnesses, such as coronary care and cancer care, with such costs expected to rise due to the increase in the ageing population [8]. Although a higher prevalence of UI is associated with greater age [3, 9, 10], UI should not be considered a normal part of ageing as UI is a treatable condition [11]. Left untreated UI is a chronic rather than a self-limiting condition, with a propensity to worsen over time.

The latest National Audit of Continence Care [12] found that poor integration of continence services across the hospital, primary care, mental health and care home settings, resulted in disjointed care for UI patients and their carers, variable levels of adherence to National Institute for Health and Clinical Excellence (NICE) guidelines, and gaps in organisational standards and clinical care. Quality of care was found to be worse for patients aged 65 years and over compared to younger patients. Whilst audit is a tool able to measure the quality of care and services against agreed standards, it is unable to provide new knowledge in order to determine best practice. To date, the contribution made by service characteristics and the management of continence at both the service and personal levels to attain effective treatment outcomes has not been addressed. To put this into context, as part of a programme of research tackling ageing continence through theory, tools and technology (TACT<sup>3</sup>), the qualitative study described in this paper explored the views and experiences of continence service leads in England regarding their work in order to identify and gain information about the key service and continence management characteristics needed to deliver effective treatment outcomes for older people with UI.

## METHODS

### Design

The study had a qualitative design, incorporating semi-structured telephone interviews, with purposive sampling of participants via a stratified sampling frame based on all former English Strategic Health Authorities (SHA).

### Participants and setting

This study was targeted at continence service leads in NHS Trusts in England providing a continence service for people aged 50 years and over. A non-random sampling strategy was used to recruit a purposive maximum-variation sample of continence service leads from urban and rural NHS Trusts located within the SHAs. As far as possible when employing a qualitative design, this approach would provide the broadest representation of continence service leads from across England, ensuring that a wide range of perspectives would be present in the dataset so that the issues of continence problems could be considered from all angles prior to identifying the common themes evident in the data [13].

An information email inviting expressions of interest was sent to 40 continence service leads; four in each of the geographical areas of the SHAs. Inclusion criteria were: (1) service provided a continence service for people aged 50 years or older; (2) participants' contact time with patients > 60% of their working week so that they have valuable knowledge of working within their continence service.

Twenty-six out of the 40 service leads originally approached who met our inclusion criteria agreed in principle to be interviewed. Ten potential participants withdrew from the study leaving a sample size of 16. The most common reasons for withdrawal from the study were: (1) due to Trust reorganisation potential participants did not have the time to participate in the study and; (2) loss of contact due to people leaving their post and/or not responding to follow up emails. Three participants were located in acute trusts, three participants were located in rural primary care trusts (PCT) and ten participants were located in urban PCTs.

### Interviews

Data were collected by individual in-depth, semi-structured telephone interviews. A topic guide was developed by the research team from the recommendations reported in the Good Practice in Continence Services document [14], the National Service Framework (NSF) for Older People [15],

1  
2  
3 NICE guidelines [16] and the National Audit of Continence Care [12]. Topics covered included the  
4 nature of service provision and priorities, challenges in meeting these priorities, the impact of national  
5 policy on service provision, the key features of service provision, how services could be improved and  
6 how trusts could improve continence care for older people. Interviews were conducted between April  
7 2011 and January 2012 at a time convenient for the participant. The average interview time was  
8 approximately 45 minutes. Oral consent from the participants was recorded at the beginning of the  
9 interviews and all participants were offered a hard copy of the consent form. Interview data were  
10 collected confidentially and digitally recorded within the university by a member of the research team  
11 and transcribed. During the interviews, first names only were referred to and names were not  
12 recorded in the transcriptions.  
13  
14  
15  
16  
17  
18  
19  
20  
21  
22

### 23 **Analysis**

24 The interview transcripts were analysed using a framework approach [17]. This is a rigorous and  
25 systematic method of qualitative analysis which combines *a priori* issues derived from key concepts in  
26 the literature and the aims of the study (deductive analysis) with categories that emerge from the data  
27 (inductive analysis) to create a thematic frame-work. Data were organised into a matrix on an Excel  
28 spread sheet with participants as rows and emerging themes as columns. Analysis followed a five  
29 stage process of familiarisation, identification of the thematic framework, indexing, charting, and  
30 mapping and interpretation [18]. Each stage was conducted by the first author and a selection of  
31 transcripts were reviewed by another member of the team (LD) to check for bias and alternative  
32 interpretation of the data. In the presentation of the results, each quote is attributed to the interviewed  
33 Continenence Service Lead (CSL) by their unique identification code. The number refers to the order in  
34 which each continence service lead was interviewed.  
35  
36  
37  
38  
39  
40  
41  
42  
43  
44  
45  
46

### 47 **Ethics**

48 A favourable opinion was obtained from NHS Bradford Research Ethics Committee (Ref No.:  
49 10/H1302/93) and research governance approval obtained from the primary care and acute trusts in  
50 each location where the continence service leads worked.  
51  
52  
53  
54  
55  
56  
57  
58  
59  
60

## RESULTS

Six themes emerged which were particularly relevant to delivering effective treatment outcomes for older people with UI. These were: Changes in attitudes towards older people with UI; Investment in service capacity; Appropriate and rapid patient referral; Patient assessment; Continence promotion regardless of age; Continence education and specialist knowledge. Each theme is considered in detail below.

### Changes in attitudes towards older people and UI

Having a negative attitude towards UI and older people was identified by all participants as a key barrier to delivering good quality treatment outcomes. The following comment typifies this:

There's GPs [General practitioners] out there still who will say to Mrs. Jones, 'well you're 85, you've had three children, what can you expect?' The challenge is to try and persuade these staff there's things that can be done to help people and not just accept the problem. Urban PCT, CSL4.

It was felt by a number of participants that these negative attitudes towards older people with UI were reinforced by other health professionals', carers' and patients' lack of knowledge and understanding about UI, its treatment and the role of continence services in providing treatment for UI:

If we were to ask a GP, 'What does the continence service do?' they probably wouldn't be able to tell you. Urban PCT, CSL3.

We found that a lot of carers are very quick to resort to the products and we're trying to get the message across that there are many things you can do before you put someone into pads. Urban PCT, CSL5.

All of the participants agreed that to improve continence services and treatment outcomes, current prejudices towards ageing and UI need to be recognised and addressed by patients, health professionals and service commissioners. In particular, if continence care for older people is perceived to be low priority and an unimportant health need, then investment in services and the efficacy of resultant treatments may be compromised. As one participant commented:

Commissioners of the [continence] service need to see it as important because if commissioners don't see it as important to meet the needs of older people then they're not going to commission a service if they think all it is is to provide pads, then that's all they're going to commission. Acute Trust, CSL12.

### Investment in service capacity

All of the respondents highlighted a lack of service capacity as being a major challenge in delivering a quality service for older people and that investment in service capacity was required to meet the increase in service demand:

At the moment we've actually had a 100 per cent increase in referrals from this time last year so some of the challenges are that obviously we haven't changed staffing so capacity is becoming an issue. Urban PCT, CSL10.

This increase in service demand may, in part, be a reflection of the current financial climate, with one participant reporting an increase in the number of people self-referring into their clinic in response to the expense of buying pads. Alternatively, this increase may be a manifestation of success breeding success:

If you've got what I hope is a reasonably successful service, then more people are aware of you and more people are referred to you. Urban PCT, CSL8.

Furthermore, all participants emphasised a staff shortage within their services which impacted on the quality and availability of the service they delivered. Indeed, some participants suggested that a lack of staff was associated with their difficulties in adhering to national policy, disparity in treatment outcomes and growing waiting lists, although one participant from a rural PCT did acknowledge that local geography also impacted on referral times into their service:

With national policy we try as best as possible to work with it. because of staffing levels it can be very difficult at times to adhere to the policies and not cut corners...and waiting lists go up [...] I don't think we're able to give the service that we should do to the elderly and it's left to the district nurses to treat where we could go out and give specific treatments, where with the district nurses it's a pad service. Urban PCT, CSL7.

I have 2.5 whole time equivalent staff for half a million people...we don't have enough people...that has an impact because we've got referrals stacking up...we get over 1000 referrals a year. We do 40 sessions per month which sounds a lot, but because of the geography it isn't because we spend a lot of time travelling and there's other stuff to do. Rural PCT, CSL6.



1  
2  
3 Moreover, some of the participants explicitly felt that an investment in trained staff and an integrated  
4  
5 continence service with other health professionals was necessary to promote continence awareness  
6  
7 and to improve the quality of patient assessments and treatment outcomes:

8  
9 If we had a proper team we could do all the assessments and offer every patient treatment. I think you  
10  
11 need trained continence advisors, but it would be nice to have a paediatric continence advisor and it  
12  
13 would be nice to have a physiotherapist. Urban PCT, CSL7.

14  
15 One participant, however, highlighted the difficulties they had experienced in forming an integrated  
16  
17 service:

18  
19 We tried to go down the route of an integrated service... [but] in terms of access to a physiotherapist  
20  
21 we've actually had difficulty within the county of finding anyone with the skills or wanting to develop those  
22  
23 skills. Urban PCT, CSL16.

24  
25 Besides an increasing demand and a shortage of skilled staff, some participants also cited a lack of  
26  
27 investment in clinics and equipment as being barriers to providing a quality service:

28  
29 We have a long waiting list in one particular area because there are no clinics based in that particular  
30  
31 area. Urban PCT, CSL3.

32  
33 If we had the staff and the equipment we could improve services... we have a lack of equipment such as  
34  
35 bladder scanners. Rural PCT, CSL1.

### 36 37 38 **Appropriate and rapid patient referral**

39  
40 Paradoxically, despite participants in the PCTs reporting a high demand by patients for their  
41  
42 continence services, several were perplexed by the lack of appropriate and timely referrals to their  
43  
44 services from GPs and other health professionals. This was primarily attributed to GPs' lack of  
45  
46 knowledge about continence services, and secondly to GPs and other health professionals referring  
47  
48 patients to the wrong services:

49  
50 Some GPs will refer people into hospital services when really it's not necessary. Because of a good  
51  
52 relationship the hospital services send them to us, so for the poor patient it means they've got two  
53  
54 appointments instead of one. Urban PCT, CSL11.

55  
56 Indeed, one participant noted discrepancies in referral pathways based on the patient's gender:  
57  
58  
59  
60

1  
2  
3 It seems to be male patients go straight to secondary care and bypass primary continence services in  
4 my area. Urban PCT, CSL15.  
5  
6  
7

8 The same participant also expressed concerns about perceived disparities in the quality of continence  
9 services provided to patients dependent on the referral pathway they had been allocated:  
10

11 For the 80 patients a month that we get there's probably 100 patients a month with continence problems  
12 who are only seen by the district nurses and they will never be seen by our service, they won't be  
13 referred to us. They will be seen and essentially, 'padded up'. They won't be investigated or given a  
14 diagnosis. So there's a very unequal service going on at the moment. Urban PCT, CSL15.  
15  
16  
17  
18  
19

20 For practitioners working in the acute sector there was an added sense of frustration as patients  
21 identified with UI on the wards could not be directly referred to the outpatients' continence service on  
22 discharge, but had to be referred via their GP. Although this recommendation was included on the  
23 patients' discharge letter, it was unsure as to whether or not this was acted upon by the patients' GPs:  
24  
25  
26

27 The key feature is for patients being referred in the first place, because I think that's part of the problem  
28 is that they are not referred when they've seen somebody about their bladder problems or it's been  
29 picked up on the ward. It's not always seen as important. Acute Trust, CSL12.  
30  
31  
32  
33

### 34 **Patient assessment**

35 A full patient assessment including complete history taking, physical examination, review of  
36 medication, urinary analysis, bladder scan, vaginal and rectal examination if appropriate, was seen by  
37 all participants as being a key feature of quality continence care for older patients, as this provided the  
38 practitioner with the necessary information to make a differential diagnosis and to formulate an  
39 individual treatment plan for each patient:  
40  
41  
42  
43  
44

45 You need to do a proper assessment so that you can actually make a nursing differential diagnosis, refer  
46 if necessary, then make a proper treatment plan up for that individual and then follow them through.  
47  
48 Urban PCT, CSL14.  
49  
50  
51

52 Some participants also advocated implementing a more holistic assessment whereby patients were  
53 seen in their own home:  
54  
55  
56  
57  
58  
59  
60

1  
2  
3 We give a full holistic assessment so that we can see patients in their own home and look at their  
4 facilities, mobility and things like that, which can quite often be part of the problem that they've got, so it's  
5 more of a functional problem than anything else. Urban PCT, CSL10.  
6  
7  
8

9  
10 The majority of participants reported that within their continence clinics they adhered to NICE  
11 guidelines, which recommended that every patient is offered an assessment:  
12

13 I think that we are following national policy quite well within the continence service. Every patient is  
14 being offered a continence assessment by a suitably qualified member of the team. Rural PCT, CSL2.  
15  
16

17  
18 One participant, however, stated that they were under pressure from non-clinical managers to bypass  
19 this process. Some of the participants also reported misgivings about the disparity in the quality and  
20 thoroughness of the assessments being provided by ward nurses in hospital and by district nurses to  
21 housebound patients and to nursing home residents who were unable to attend continence clinics:  
22  
23

24 The district nurses do what we would call basic assessments for us so they would see the patients that  
25 have been referred to them, usually by the hospital if they've been discharged from secondary care, and  
26 it's just basically a pad assessment. Urban PCT, CSL10.  
27  
28

29 The district nurses who go to see the patients only assess for products. They don't look at the bigger  
30 picture. Urban PCT, CSL7.  
31  
32  
33  
34  
35

### 36 **Continence promotion regardless of age**

37  
38 Continence promotion, rather than pad provision, was identified by all of the participants as being a  
39 central tenet of the management of older people with UI:  
40

41 Everybody should have the right to be continent so we really aim to try and get people continent  
42 whenever possible. Urban PCT, CSL14.  
43  
44  
45

46  
47 The majority of participants, however, reported encountering problems in achieving this outcome, with  
48 several participants citing patients' and carers' expectations of just receiving pads from the continence  
49 service as the only treatment available to them:  
50

51  
52 People still view our service as the pad providers as much as we try and shout that we're not just about  
53 pads. Urban PCT, CSL16.  
54

55 The expectation seems to be an expectation of pads... it isn't any expectation that they might get better.  
56  
57 Urban PCT, CSL15.  
58  
59  
60

Two of the participants described how they were able to manage and to change patients' and carers' expectations to resolve this issue and to produce better quality treatment outcomes for the patient:

When I hear the patient's story, that yes they were looking for pads, I will explain to them what could be going on and that we will work with them to see if we can get them better... very few people then say, 'I don't want to get better', so it depends on how you deliver it. Rural PCT, CSL6.

If people's first interaction regarding continence is a positive one that gives you treatment, it's better than the first person they see saying, 'here are some pads'. We would be able to help more people and improve their symptoms rather than give them the message that you wear a pad and put up with your symptoms. Urban PCT, CSL16.

### **Continence education and specialist knowledge**

Having a highly trained and knowledgeable workforce responsible for delivering high quality continence care was identified by the majority of participants as being an essential feature of a quality continence service for older people. Certainly all of the participants reported having at least one specialist continence nurse on their team:

I think one of the key features [of the service] is to have a suitable trained nurse and a suitable team to implement assessment and treatment as opposed to just products. Urban PCT, CSL7.

In order to develop and improve the knowledge base and competency levels of their staff, all of the participants recognised the importance of providing and attending on-going staff training programmes, with one participant suggesting that education should be prioritised:

Training is an integral part of the service because obviously our service is with specialist nurses who themselves access training and maintain their level of competence. Urban PCT, CSL11.

All of the participants recognised and acknowledged that district nurses and other health care professionals do not have the specialist skills and knowledge of the continence specialist nurse and felt that access to training for these professionals was essential to promote continence and to raise standards and parity in patient assessments:

I'd like to have more time with district nurses to bring up their level of continence assessment. Urban PCT, CSL8.

1  
2  
3 A wide range of training programmes was provided by the majority of participants for anyone involved  
4 with looking after someone with continence problems. Some of the participants, however, revealed  
5 that they had experienced difficulties in delivering these programmes to their targeted audiences due  
6 to continence promotion not being recognised as a priority area by the trust and to staff shortages:  
7  
8  
9

10 We've asked the question whether continence assessment training could be mandatory for district  
11 nurses but the trust aren't too happy to do that at the moment. Urban Pct, CSL16.

12  
13 We have a training programme but the unfortunate thing is that a lot of teams are very short-staffed so  
14 being released from training is quite difficult. Urban PCT, CSL3.  
15  
16  
17  
18

## 19 DISCUSSION

20 The aim of this study was to explore the views and experiences of continence service leads in  
21 England in order to identify and gain information about the key service and continence management  
22 characteristics needed to deliver effective treatment outcomes for older people with UI. Foremost  
23 among the issues raised by the continence service leads was a failure on the part of commissioners,  
24 managers and other health professionals in recognising the problem of UI and acknowledging the  
25 importance of continence for older people and the impact it has on other areas of health, such as  
26 quality of life, tissue viability and falls. This was seen by all practitioners as a major barrier to effective  
27 treatment outcomes for older people with UI. Indeed, some continence service leads were highly  
28 critical of current commissioning practices which focused on purchasing pad provision rather than  
29 implementation of national guidelines, and feared that their continence services may not be  
30 recommissioned by service providers after the 2013 National Health Service (NHS) in England  
31 reorganisation.  
32  
33  
34  
35  
36  
37  
38  
39  
40  
41  
42

43 This failure by commissioners and other health professionals in valuing the importance of  
44 continence promotion in older people may be indicative of the low status of UI and implicit ageism.  
45 Ageism, defined as a process of systematic stereotyping of, and discrimination against, people  
46 because they are old [19], is evident amongst some doctors and other health care professionals and  
47 has been shown to impact negatively on the care older patients receive [20-24]. Therefore, there  
48 needs to be a change at the top level to the ageist beliefs and attitudes about UI held by  
49 commissioners and other health professionals to one which advocates candidacy for the treatment of  
50 older people with UI by recognising that continence services provide a specialist service able to treat  
51 and potentially cure the majority of patients, including older patients, using conservative management.  
52  
53  
54  
55  
56  
57  
58  
59  
60

1  
2  
3 This can be achieved by increasing the continence service profile and by a change in commissioning  
4 practice. By buying into a service that adheres to national guidelines with regards to patient  
5 assessment and continence promotion rather than pad provision, standards of UI care for older people  
6 can be raised, and quality of life improved. For example, results from a recent study assessing the  
7 quality of care of older ambulatory patients aged more than 75 years have shown that better quality of  
8 care for UI is associated with an improvement in UI related quality of life [25].  
9

10  
11  
12  
13  
14 Investment in service capacity in terms of clinics, equipment and staff (including training) was  
15 identified as being a key factor in meeting the increasing demand for continence services by older  
16 people, as this was envisaged to reduce the gaps in local service provision and facilitate access to  
17 and availability of continence services. Despite National Guidelines there appears to be a “post code  
18 lottery” for continence services. In particular clinical leads from the rural PCTs felt that a failure by  
19 their Trusts to invest in the clinical infrastructure had a negative impact on their ability to provide a  
20 local continence service and they were concerned that access to their services was restricted in  
21 certain areas due to a lack of public transport and the long distances patients had to travel, (i.e. the  
22 distance decay effect, whereby the further away a service is the less likely it is to be used [26]). This  
23 interplay between organisational and geographical barriers as confounding factors in the ability of  
24 older people to access health services in a timely fashion is well documented as rural communities in  
25 general face poor access to health care services and may be offered a more limited range of services  
26 [27, 28]. For rural continence services this interaction between organisation and geography was  
27 amplified by staff shortages, as most staff work part time, resulting in fewer clinics being held due to  
28 the length of time spent in travelling. A better understanding of the issues surrounding rural health is  
29 therefore required by commissioners to ensure proofing of rural continence services, so as to identify  
30 and support the principles underpinning best practice.  
31  
32  
33  
34  
35  
36  
37  
38  
39  
40  
41  
42  
43  
44

45 The delivery and implementation of a full continence assessment by highly trained individuals,  
46 together with continence promotion to every patient, regardless of age, were identified by all  
47 continence service leads as two of the key features of a high quality and effective service for older  
48 people with UI. These findings are to be expected as the Good Practice in Continence Services [14]  
49 recommends that, “*All patients presenting with incontinence should be offered an initial assessment by*  
50 *a suitably trained professional.*” Furthermore, The European Association of Urology guidelines on UI  
51 advocate that healthy older people should be offered a similar range of treatment options as younger  
52  
53  
54  
55  
56  
57  
58  
59  
60

1  
2  
3 people and that treatment should be individualised for frail older people [29]. Moreover, NICE  
4  
5 guidelines specify that absorbent products are not a treatment of UI but rather should be used as: a  
6  
7 coping strategy for patients awaiting definitive treatment; an add-on to on-going therapy; and long-  
8  
9 term management of UI only after other treatment options have been explored [16]. Our results,  
10  
11 however, indicated a widespread feeling of frustration amongst the continence service leads at not  
12  
13 being able to fulfil and realise all of the unmet needs for continence care services on account of  
14  
15 patients not knowing what they want or what treatments they could have, inappropriate referrals by  
16  
17 GPs and other health professionals and a lack of investment in service capacity, service integration  
18  
19 and health professional education.

20  
21 The quality of continence assessments delivered to domiciliary and nursing home patients by  
22  
23 district nurses and other health professionals, as opposed to continence nurse specialists, was also  
24  
25 deemed to be an inferior key service characteristic which contributed to the disparity in the quality of  
26  
27 care for older people with UI. Furthermore, in certain cases, this was compounded by GPs and other  
28  
29 health professionals referring patients into the wrong service, delaying their referrals, or in extreme  
30  
31 cases not referring patients at all to the continence service. Several factors may be related to such  
32  
33 behaviours, including: the short time available for GP consultations as female patients rarely present  
34  
35 with UI as a primary complaint; GPs preferring to prescribe medications and pads due to a lack of faith  
36  
37 in the efficacy of conservative treatment of UI; and GPs' lack of knowledge of continence services [30-  
38  
39 33]. Moreover, there is a growing body of evidence to suggest that many GPs have limited training  
40  
41 and skills for the treatment and assessment of UI at both undergraduate and postgraduate levels [30,  
42  
43 32, 33] and a substantial deficit in geriatric knowledge and training [27]. Likewise, findings from a  
44  
45 recent nursing survey revealed gaps in nurse training and education for continence management,  
46  
47 suggesting that nurses are not receiving sufficient support to assess and care for people with UI [34].  
48  
49 This apparent lack of knowledge and training needs to be addressed quickly by the promotion and  
50  
51 endorsement of UI education in both medical and nursing curricula and by commissioners making  
52  
53 available and supporting training opportunities for non-specialist continence nurse specialists and  
54  
55 other health professionals.

56  
57 There was consensus amongst the continence service leads that there needed to be  
58  
59 investment in the development and implementation of integrated continence services to improve  
60  
service quality and the patient experience. Results from earlier research suggest that integrated

1  
2  
3 continence care in primary care improved the effectiveness of continence services and was  
4 associated with high patient satisfaction levels [35-37]. Although the National Service Framework  
5 (NSF) for Older People [15] required the establishment of integrated continence services for older  
6 people by April 2004 none of the continence service leads in this study worked in an integrated  
7 service. Indeed, findings from the latest national audit of continence care only reported four fully  
8 integrated continence services in England [12]. Therefore there is a pressing need to adopt a more  
9 dynamic approach in the provision of continence services, whereby all practice professionals are  
10 involved in the prevention, recognition, assessment and treatment of UI. By putting into effect  
11 integrated continence care services it is anticipated that this will help to meet the health care  
12 challenges of an ageing population and an increasing prevalence of treatable UI.  
13  
14  
15  
16  
17  
18  
19  
20  
21  
22

### 23 **Strengths and limitations**

24 This study directly asked continence service leads in England to identify key features of a high quality  
25 and efficacious continence service for older people with UI. Our sampling strategy ensured a good  
26 representation of participants from across the range of former SHAs, while the use of qualitative  
27 interviews was the optimal method for this study as it allowed participants to discuss in detail and to  
28 express openly their opinions on the key features of a successful service and how continence services  
29 for older people could be improved. While there are always limits on the extent to which one can  
30 generalise the results of qualitative research, our findings have good face validity as the main themes  
31 identified in our analyses are reflected in relevant studies [38]. Data were only collected in England as  
32 healthcare in Wales, Scotland and Northern Ireland is devolved and has no internal healthcare market,  
33 and so the study has a limited contribution to the debate on continence management in these areas of  
34 the UK.  
35  
36  
37  
38  
39  
40  
41  
42  
43  
44  
45  
46

### 47 **CONCLUSION**

48 Patient assessment and continence promotion regardless of age, rather than pad provision, were  
49 identified as key issues for delivering effective treatment outcomes for older people with UI. To  
50 achieve this, the primary response by commissioners and other health professionals should be to  
51 improve attitudes towards continence and older people. This, coupled with more rapid and  
52 appropriate patient referral pathways, investment in service capacity, (including trained staff and  
53  
54  
55  
56  
57  
58  
59  
60



1  
2  
3 facilities), strengthened inter-service collaborations and a higher profile within medical and nursing  
4 training were specified as being important for delivering an equitable and high quality continence  
5 service. Addressing quality in these identified priority areas may lead to the raising of standards in  
6 continence care for older people with UI.  
7  
8  
9

10  
11  
12  
13  
14 **FUNDING** Funding was received from the New Dynamics of Ageing Programme, led by the Economic  
15 & Social Research Council, UK (grant number RES-353-25-0010).  
16  
17

18  
19 **COMPETING INTERESTS** None. All authors have completed the ICMJE uniform disclosure form at  
20 [icmje.org/coi\\_disclosure.pdf](http://icmje.org/coi_disclosure.pdf) (available on request from the corresponding author) and declare: no  
21 support from any organisation for the submitted work; no financial relationships with any organisations  
22 that might have an interest in the submitted work in the previous three years; no other relationships or  
23 activities that could appear to have influenced the submitted work.”  
24  
25  
26  
27  
28

#### 29 30 **DATA SHARING**

31  
32 Data from this study have been deposited with the ESRC data store which can be accessed on  
33 [www.data-archive.ac.uk](http://www.data-archive.ac.uk)  
34  
35  
36  
37  
38  
39  
40  
41  
42  
43  
44  
45  
46  
47  
48  
49  
50  
51  
52  
53  
54  
55  
56  
57  
58  
59  
60

1  
2  
3 **Licence** The Corresponding Author has the right to grant on behalf of all authors and does grant of  
4 behalf of all authors, an exclusive licence (or non exclusive for government employees) on a  
5 worldwide basis to the BMJ Publishing Group Ltd and its Licensees to permit this article (if accepted)  
6 to be published in BMJ editions and any other BMJPL products and sublicences to exploit all  
7 subsidiary rights, as set out in our licence  
8  
9  
10

11  
12  
13  
14 **AUTHORS' CONTRIBUTION** AO, KM, LD, MG and SGP contributed to the conception and design of  
15 the study. AO contributed to the data acquisition. AO and LD contributed to the analysis and  
16 interpretation of the data. AO wrote the manuscript and all authors contributed to the critical revision  
17 and final approval of the manuscript.  
18  
19  
20  
21  
22  
23  
24  
25  
26  
27  
28  
29  
30  
31  
32  
33  
34  
35  
36  
37  
38  
39  
40  
41  
42  
43  
44  
45  
46  
47  
48  
49  
50  
51  
52  
53  
54  
55  
56  
57  
58  
59  
60

## REFERENCES

1. Irwin DE, Mungapen L, Milsom I, Kopp Z, Reeves P, Kelleher C. The economic impact of overactive bladder syndrome in six Western countries. *BJU Int*. 2008;103(2):202-209.
2. Hunskar S, Arnold EP, Burgio K, Diokno AC, Herzog AR, Mallett VT. Epidemiology and natural history of urinary incontinence. *Int Urogynecol J Pelvic Floor Dysfunct* 2000;11(5):301-319.
3. Hunskar S, Lose G, Sykes D, Voss. The prevalence of urinary incontinence in women in four European countries. *BJU Int* 2004;93:324-330.
4. Bartoli S, Aguzzi G, Tarricone R. Impact on quality of life of urinary incontinence and overactive bladder: a systematic literature review. *Urology* 2010;75(3):491-500.
5. Thom DH, Haan MN, van den Eeden SK. Medically recognised urinary incontinence and the risks of hospitalisation, nursing home admission and mortality. *Age Ageing* 1997;26(5):367-374.
6. Coyne KS, Zhou Z, Thompson C, Versi E. The impact of health-related quality of life of stress, urge and mixed urinary incontinence. *BJU Int* 2003;92(9):731-735.
7. Martin C, Williams C, O'Neill D. Retrospective analysis of attitudes to ageing in the *Economist*: apocalyptic demography for opinion formers? *BMJ* 2009;339:1435-1437.
8. Debruyne FM, Heesakkers JP. Clinical and socioeconomic relevance of overactive bladder. *Urology* 2004;63:42-44.
9. Buckley BS, Lapitan MCM. Prevalence of urinary incontinence in men, women and children – current evidence: findings of the fourth international consultation on incontinence. *Urology* 2010;76(2):265-270.
10. Wagg A. Continence, incontinence and the ageing males 2010.  
[http://www.bgs.org.uk/index.php?option=com\\_content&view=article&id=242:continenceincontinencewagg&catid=51:publications&itemid=147](http://www.bgs.org.uk/index.php?option=com_content&view=article&id=242:continenceincontinencewagg&catid=51:publications&itemid=147)
11. Mitteness LS, Barker JC. Stigmatizing a “normal” condition: urinary incontinence in late life. *Med Anthropol Q* 1995;9(2):199-210.
12. Royal College of Physicians National Audit of Continence Care 2010  
<http://www.rcplondon.ac.uk/resources/national-audit-continence-care>
13. Teddlie C, Yu F. Mixed methods sampling: a typology with examples. *J Mixed Methods Res* 2007;1:77-100.
14. Department of Health. Good practice incontinence services. HMSO: London, 2000.

15. Department of Health. National service framework for older people. HMSO: London, 2001.
16. NICE CG 40 Urinary incontinence in women 2006 <http://guidance.nice.org.uk/CG40>
17. Ritchie J, Spencer L. Qualitative data analysis for applied research policy. In: A Bayman, RG Burgess (eds.), *Analysing Qualitative Data*, London: Routledge, 1993, pp. 173-194.
- 18 Pope C, Ziebland S, Mays N. Qualitative research in health care. *BMJ* 2000;320:114-116.
19. Cohen E. The complex nature of ageism: what is it? Who does it? Who perceives it? *Gerontol* 2001;41:576-577.
20. Lothian K, Philip I. Maintaining the dignity and autonomy of older people in the healthcare setting. *BMJ* 2001;322:668-670.
21. Gunderson A, Tomkowiak J, Menachemi N, Brooks R. Rural physicians' attitudes towards the elderly: evidence of ageism? *Q Manage Health Care* 2005; 14:167-176.
22. Gallagher S, Bennett KM, Halford JCG. A comparison of acute and long-term health-care personnel's attitudes towards older adults. *Int J Nurs Pract* 2006;12:273-279.
23. Leung S, Lo Giudice D, Schwarz J, Brand C. Hospital doctors' attitudes towards older people. *Int Med J* 2011;41:308-314.
24. Courtney M, Tong S, Walsh A. Acute-care nurses' attitudes towards older patients: a literature review. *Int J Nurs Pract* 2000;6:62-69.
25. Min LC, Reuben DB, Adams J, Shekelle PG, Ganz DA, Roth CP, et al. Does better quality of care for falls and urinary incontinence result in better participant-reported outcomes? *J Am Geriatr Soc* 2011;59:1435-1443.
26. Mungall I. Trend towards centralisation of hospital services and its effects on access to care for rural and remote communities in the UK. *Rural Remote Health* 2005;5(2):390.
27. European Commission. Quality in and equality of access to healthcare. European Commission 2008.
28. Commission for Healthcare Audit and Inspection. Living well in later life. A review of progress against national standard framework for older people 2006.
29. Schroder A, Abrams P, Andersson K-E, Artibani W, Chapple CR, Drake MJ et al., Guidelines on urinary incontinence. European Association of Urology 2009.
30. Grealish M, O'Dowd TC. General practitioners and women with urinary incontinence. *Br J GP* 1998;48:975-978.

- 1  
2  
3 31 Shaw C, Atwell C, Wood F, Brittain K, Williams K. A qualitative study of the assessment and  
4 treatment of incontinence in primary care. *Fam Pract* 2007;24:461-467.  
5  
6 32 Gerrits M, Avery T, Largo-Janssen ALM. Urinary incontinence management in women: audit in  
7 general practice. *J Eval Clin Pract* 2008;14:836-838.  
8  
9 33. van Gerwen M, Schellevis F, Lagro-Janssen A. Management of urinary incontinence in general  
10 practice: data from the second Dutch national survey. *J Eval Clin Pract* 2009;15:341-345.  
11  
12 34. Nursing Times Survey 2009 [http://www.nursingtimes.net/nurses-must-receive-sufficient-](http://www.nursingtimes.net/nurses-must-receive-sufficient-contenance-education-and-training/5001846.article)  
13 [contenance-education-and-training/5001846.article](http://www.nursingtimes.net/nurses-must-receive-sufficient-contenance-education-and-training/5001846.article)  
14  
15 35. Wagg A, Lowe D, Peel P, Potter J. Do self-reported 'integrated' continence services provide high  
16 quality continence care? *Age Ageing* 2009;38(6):730-733.  
17  
18 36. Bayliss V, Salter L. Pathways for evidence-based continence care. *Nurs Stand* 2004;19:45-51.  
19  
20 37. Williams K, Assassa R, Cooper N, Turner D, Shaw C, Abrams K, et al. Clinical and cost-  
21 effectiveness of a new nurse-led continence service: a randomised controlled trial. *Br J Gen Pract*  
22 2005;55:696-703.  
23  
24 38. Cheater FM. Overcoming the barriers to optimum continence care: the need for an expanded  
25 approach to implementation. *Int J Older People Nurs* 2009;4:70-75.  
26  
27  
28  
29  
30  
31  
32  
33  
34  
35  
36  
37  
38  
39  
40  
41  
42  
43  
44  
45  
46  
47  
48  
49  
50  
51  
52  
53  
54  
55  
56  
57  
58  
59  
60

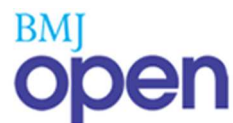

**Improving continence services for older people from the service-providers' perspective: a qualitative interview study**

|                                 |                                                                                                                                                                                                                                                                                                                                                                                                         |
|---------------------------------|---------------------------------------------------------------------------------------------------------------------------------------------------------------------------------------------------------------------------------------------------------------------------------------------------------------------------------------------------------------------------------------------------------|
| Journal:                        | <i>BMJ Open</i>                                                                                                                                                                                                                                                                                                                                                                                         |
| Manuscript ID:                  | bmjopen-2013-002926.R1                                                                                                                                                                                                                                                                                                                                                                                  |
| Article Type:                   | Research                                                                                                                                                                                                                                                                                                                                                                                                |
| Date Submitted by the Author:   | 31-May-2013                                                                                                                                                                                                                                                                                                                                                                                             |
| Complete List of Authors:       | Orrell, Alison; University of Sheffield, School of Health and Related Research<br>McKee, Kevin; Dalarna University, School of Health and Social Studies<br>Dahlberg, Lena; Dalarna University, School of Health and Social Studies<br>Gilhooly, Mary; Brunel University, School of Health Science and Social Care<br>Parker, Stuart; University of Sheffield, Sheffield Institute for Studies on Ageing |
| <b>Primary Subject Heading</b>: | Geriatric medicine                                                                                                                                                                                                                                                                                                                                                                                      |
| Secondary Subject Heading:      | Health services research, Qualitative research, Urology                                                                                                                                                                                                                                                                                                                                                 |
| Keywords:                       | Urinary incontinences < UROLOGY, Quality in health care < HEALTH SERVICES ADMINISTRATION & MANAGEMENT, GERIATRIC MEDICINE                                                                                                                                                                                                                                                                               |
|                                 |                                                                                                                                                                                                                                                                                                                                                                                                         |

SCHOLARONE™  
Manuscripts

1  
2  
3 **Improving continence services for older people from the service-providers' perspective: a**  
4 **qualitative interview study**  
5  
6  
7  
8  
9

10 **Abstract**  
11

12 **Objective:** To examine in depth the views and experiences of continence service leads in England on  
13 key service and continence management characteristics in order to identify and improve our  
14 understanding of barriers to a good quality service and potential facilitators to develop and improve  
15 services for older people with urinary incontinence (UI).  
16  
17  
18

19  
20  
21 **Design:** Qualitative semi-structured interviews using a purposive sample recruited across 16  
22 continence services.  
23

24  
25 **Setting:** Three acute and 13 primary care National Health Service Trusts in England.  
26  
27

28 **Participants:** Sixteen continence service leads in England actively treating and managing older  
29 people with UI.  
30  
31

32 **Results:** In terms of barriers to a good quality service, participants highlighted a failure on the part of  
33 commissioners, managers and other health professionals in recognising the problem of UI and in  
34 acknowledging the importance of continence for older people, and prevalent negative attitudes  
35 towards continence and older people. Patient assessment and continence promotion regardless of  
36 age, rather than pad provision, were identified as important steps for a good quality service for older  
37 people with UI. More rapid and appropriate patient referral pathways, investment in service capacity,  
38 e.g. more trained staff, and strengthened inter-service collaborations and a higher profile within  
39 medical and nurse training were specified as being important facilitators for delivering an equitable  
40 and high quality continence service. There is a need, however, to consider the accounts given by our  
41 participants as perhaps serving the interests of their professional group within the context of inter-  
42 professional work.  
43  
44  
45  
46  
47  
48  
49  
50  
51  
52

53 **Conclusions:** Our data point to important barriers to and facilitators of a good quality service for older  
54 people with UI, from the perspective of continence service leads. Further research should address  
55  
56  
57  
58  
59  
60

1  
2  
3 the views of other stakeholders, and explore options for the empirical evaluation of the effectiveness  
4  
5 of identified service facilitators.  
6  
7  
8  
9  
10  
11  
12  
13  
14  
15  
16  
17  
18  
19  
20  
21  
22  
23  
24  
25  
26  
27  
28  
29  
30  
31  
32  
33  
34  
35  
36  
37  
38  
39  
40  
41  
42  
43  
44  
45  
46  
47  
48  
49  
50  
51  
52  
53  
54  
55  
56  
57  
58  
59  
60

For peer review only



## Article Summary

### Article focus

- Urinary incontinence affects both men and women, but the quality of continence care provided is worse for patients aged 65 years and over compared to younger patients.
- To explore the views and experiences of continence service leads in England to identify and improve our understanding of barriers to a good quality service and potential facilitators to develop and improve services for older people with urinary incontinence (UI).

### Key messages

- Patient assessment and continence promotion regardless of age, rather than pad provision are the key issues for improving continence services for older people with UI.
- Improving attitudes towards continence and older people, together with more rapid and appropriate patient referral pathways, strengthened inter-service collaborations, investment in service capacity and a higher profile of UI within medical and nurse training may lead to the raising of standards in continence care for older people with urinary incontinence.

### Strengths and limitations

- This study directly asked continence service leads in England to identify key features of a high quality and efficacious continence service for older people with urinary incontinence.
- Our sampling strategy ensured a good representation of participants and the use of qualitative interviews was the optimal method for this study as it allowed participants to discuss in detail and to express openly their opinions.
- Data from other stakeholder groups in continence care was not collected.
- Data were only collected in England as healthcare in Wales, Scotland and Northern Ireland is devolved and has no internal market. .

## INTRODUCTION

Urinary incontinence (UI) is a common condition that affects both men and women and is defined by the International Continence Society as, 'the complaint of any involuntary leakage of urine' [1]. Findings from an earlier epidemiological study to establish the prevalence of urinary symptoms in community-dwelling adults in Great Britain revealed that approximately 23% of women and 8.7% of men over the age of 40 years have urinary symptoms and that the prevalence and severity of symptoms increase with age [2-4]. For people with cognitive impairment or dementia living at home results from a recent systematic review reported that the prevalence of UI ranged from 1.1% in a general community population to 38% in those receiving home care services [5]. Direct costs of UI to the National Health Service (NHS) are reported to be greater than those associated with common chronic illnesses, such as coronary care and cancer care, with these costs expected to rise due to the increase in the ageing population [6].

UI can have a substantial impact on the physical, psychological, social and economic well-being of the affected individual and their families [7-9], as UI symptoms are associated with significant morbidity and an increased risk of hospitalisation and admission to institutional care [10, 11]. Furthermore, negative attitudes towards older people (e.g. burden on society) and UI (e.g. distaste) are common in both society and health care, and impact on the provision of health care services [12]. Although a higher prevalence of UI is associated with greater age [2, 3, 13-15], UI should not be considered a normal part of ageing as UI is a treatable condition [16]. According to Fonda and Abrams' "Continence Paradigm" for defining incontinence and continence management for all ages, UI can be controlled by behavioural treatments, medications or with toileting assistance or contained with pads or appliances [17]. Left untreated, however, UI is a chronic rather than a self-limiting condition, with a propensity to worsen over time.

UI usually presents and is identified in primary care settings by General Practitioners (GPs) and nurses, although the pathways to diagnostic assessment can be inconsistent with some individuals being referred directly to a variety of specialists in secondary care (e.g. physiotherapists, gynaecologists, urologists, geriatricians or specialist nurses based in secondary care) without any assessment or treatment [18]. Continence services in England are provided by GPs, Acute Trusts, private providers for the NHS, alternative providers, e.g. social enterprises and primary care

1  
2  
3 providers; with treatment being delivered in hospitals, GP surgeries, nursing and care homes,  
4 community clinics and primary care centres [18]. Generally, however, symptomatic diagnoses occur  
5 in primary care and condition-specific in secondary care.  
6  
7

8  
9 According to the National Institute for Health and Clinical Excellence (NICE) guidelines for  
10 commissioning a urinary continence service, primary care and community teams are expected to  
11 have trained professionals able to perform initial assessment and conservative management of UI  
12 and/ or a referral pathway to a specialist continence service [19]. In addition, patients presenting with  
13 UI and symptoms indicating a more complex condition should have access to a specialist continence  
14 service that employs, amongst others, specialist continence nurse advisers (registered nurses with  
15 extensive training up to degree level in continence care and able to work as independent  
16 practitioners) and specialist physiotherapists [18]. Despite these recommendations, the latest  
17 National Audit of Continence Care [20] found that poor integration of continence services across the  
18 hospital, primary care, mental health and care home settings, resulted in disjointed care for UI  
19 patients and their carers, variable levels of adherence to NICE guidelines, and gaps in organisational  
20 standards and clinical care. Furthermore, quality of care was found to worse for patients aged 65  
21 years and over compared to younger patients.  
22  
23  
24  
25  
26  
27  
28  
29  
30  
31  
32  
33

34 Whilst audit is a tool able to measure the quality of care and services against agreed  
35 standards, it is unable to provide new knowledge in order to determine best practice. To date, the  
36 contribution made by service characteristics and the management of continence at both the service  
37 and personal level to attain optimal quality of care for older people with UI has not been addressed.  
38 To put this into context, as part of a programme of research tackling ageing continence through  
39 theory, tools and technology (TACT3), the aims of the qualitative study described in this paper were to  
40 explore the views and experiences of continence service leads (specialists) in order to identify and  
41 improve our understanding of barriers to a good quality service and potential facilitators to develop  
42 and improve services for older people with urinary incontinence (UI). Such knowledge may be  
43 important to the development of patient care and the design of professional education programmes  
44 and to inform service commissioners.  
45  
46  
47  
48  
49  
50  
51  
52  
53  
54

## 55 **METHODS**

### 56 **Design**

1  
2  
3 The study had a qualitative design, incorporating semi-structured telephone interviews, with purposive  
4 sampling of participants via a stratified sampling frame based on all former English Strategic Health  
5 Authorities (SHA).  
6  
7  
8  
9  
10

### 11 **Participants and setting**

12  
13  
14 This study was targeted at senior and specialist continence nurse practitioners acting as continence  
15 service leads in NHS Trusts in England providing a continence service for community-dwelling people  
16 aged 50 years and over. We targeted the leads of specialist continence services rather than GPs or  
17 District Nurses because they are: (1) expert practitioners with extensive training in continence care  
18 and; (2) front line staff in delivering continence services.  
19  
20  
21  
22  
23

24  
25 A non-random sampling strategy was used to recruit a purposive maximum-variation sample  
26 of continence service leads from urban and rural NHS Trusts located within the SHAs. As far as  
27 possible when employing a qualitative design, this approach would provide the broadest  
28 representation of continence service leads from across England, ensuring that a wide range of  
29 perspectives would be present in the dataset so that the issues of continence problems could be  
30 considered from all angles prior to identifying the common themes evident in the data [21]. An  
31 information email inviting expressions of interest was sent to 40 continence service leads; four in each  
32 of the geographical areas of the SHAs. Inclusion criteria were: (1) service provided a continence  
33 service for people aged 50 years or older; (2) participants' contact time with patients > 60% of their  
34 working week so that they have valuable knowledge of working within their continence service.  
35  
36 Twenty-six out of the 40 service leads originally approached who met our inclusion criteria agreed in  
37 principal to be interviewed. Ten potential participants withdrew from the study leaving a sample size  
38 of 16. The most common reasons for withdrawal from the study were: (1) due to Trust reorganisation  
39 potential participants did not have the time to participate in the study and; (2) loss of contact due to  
40 people leaving their post and/or not responding to follow up emails. Due to the time constraints for  
41 this study and the length of time required to apply for and gain NHS research governance approval,  
42 we did not replace the original ten participants who withdrew from the study. Three participants were  
43 located in acute trusts, three participants were located in rural primary care trusts (PCT) and ten  
44 participants were located in urban PCTs.  
45  
46  
47  
48  
49  
50  
51  
52  
53  
54  
55  
56  
57  
58  
59  
60

## Interviews

Data were collected by individual in-depth, semi-structured telephone interviews. A topic guide was developed by the research team from the recommendations reported in the Good Practice in Continence Services document [22], the National Service Framework (NSF) for Older People [23], NICE guidelines [19] and the National Audit of Continence Care [20]. Topics covered included the nature of service provision and priorities, challenges in meeting these priorities, the impact of national policy on service provision, the key features of service provision, how services could be improved and how trusts could improve continence care for older people. Interviews were conducted between April 2011 and January 2012 at a time convenient for the participant. The average interview time was approximately 45 minutes. Oral consent from the participants was recorded at the beginning of the interviews and all participants were offered a hard copy of the consent form. Interview data were collected confidentially and digitally recorded within the university by a member of the research team and transcribed. During the interviews, first names only were referred to and names were not recorded in the transcriptions.

## Analysis

The interview transcripts were analysed using Framework Analysis [24], which is an approach to qualitative data analysis developed by social policy researchers in the UK and increasingly used in health care research [26]. Framework Analysis is a pragmatic approach for applied research, developed to address specific real-world questions and with less focus on producing new theory than other approaches to qualitative data analysis, such as grounded theory [26]. In accordance with Framework Analysis, the data analysis followed a five stage process [24, 26, 27]:

1. Familiarisation: becoming familiar with and getting an overview of the richness, depth and diversity of material gathered.
2. Identification of the thematic framework: identifying key issues, concepts and themes according to which the data can be examined by combining *a priori* issues derived from key concepts in the

1  
2  
3 literature and the aims of the study (deductive analysis) with categories derived from the data  
4  
5 (inductive analysis).

- 6  
7  
8  
9  
10  
11  
12  
13  
14  
15  
16  
17  
18  
19  
20  
21  
22  
23  
24  
25  
26  
27  
28  
29  
30  
31  
32  
33  
34  
35  
36  
37  
38  
39  
40  
41  
42
3. Indexing: a process of applying the thematic framework to the data, using codes to identify specific pieces of data that correspond with differing themes (in other qualitative analysis approaches often called 'coding').
  4. Charting: creating charts with headings and subheadings drawn from the thematic framework; in this study data were organised into a chart, using Excel, with participants as rows and emerging themes as columns.
  5. Mapping and interpretation: pull together key characteristics of the data, and map and interpret the data set as a whole.

Each stage of the analysis was conducted by the first author. To improve inter-rater reliability a selection of transcripts were reviewed by another member of the team (LD) to check for bias and alternative interpretation of the data. Revisiting the interview transcripts, all themes were represented within the first 12 interviews, with an indication that data saturation had been achieved as no new themes emerged from the remaining interviews [28, 29]. In the presentation of the results, each quote is sequentially numbered, and attributed to the Continence Service Lead (CSL) interviewed via an identification code, allocated in the order in which the continence service leads were interviewed.

## 43 44 45 46 47 48 49 50 51 52 53 54 55 56 57 58 59 60

### Ethics

A favourable opinion was obtained from NHS Bradford Research Ethics Committee (Ref No.: 10/H1302/93) and research governance approval obtained from the primary care and acute trusts in each location where the continence service leads worked.

## RESULTS

1  
2  
3 Sixteen continence service leads participated in the study. There were more women (n = 14) than  
4 men (n = 2). Two participants were Clinical Lead Continence Nurses, six participants were Service  
5 Leads, two participants were Continence Nurse Specialists, two participants were Service Managers,  
6  
7 three participants were Lead Specialist Continence Nurses and one participant was a Team and  
8  
9 Clinical Facilitator. All respondents had spent a significant part of their working lives as continence  
10  
11 specialists (mean 9 years, range 1 to 15 years) and the time in their current post varied from 1 to 15  
12  
13 years, with a mean of 6 years.  
14

15  
16 From the analysis, six themes emerged that related to barriers to a good quality service and  
17 potential facilitators to develop and improve services for older people with urinary incontinence (UI),  
18 with an additional seventh cross-cutting theme. . These six themes were: Changes in attitudes  
19  
20 towards older people and UI; Investment in service capacity; Appropriate and rapid patient referral;  
21  
22 Patient assessment; Continence promotion regardless of age; Continence education and specialist  
23  
24 knowledge; and the seventh cross-cutting theme, Allocating the blame. Each theme is considered in  
25  
26 detail below.  
27  
28  
29  
30

### 31 **Changes in attitudes towards older people and UI**

32  
33 Having a negative attitude towards UI and older people was identified by all participants as a key  
34  
35 barrier to delivering good quality **care**. The following comment typifies this:  
36

37 "There's GPs [General Practitioners] out there still who will say to Mrs. Jones, 'well you're 85, you've  
38 had three children, what can you expect?' The challenge is to try and persuade these staff there're  
39 things that can be done to help people and not just accept the problem." (1) Urban PCT, CSL4.  
40  
41  
42

43  
44 It was felt by a number of participants that these negative attitudes towards older people with UI were  
45 reinforced by other health professionals', carers' and patients' lack of knowledge and understanding  
46  
47 about UI, its treatment and the role of continence services in providing treatment for UI:  
48

49 "If we were to ask a GP, 'What does the continence service do?' they probably wouldn't be able to tell  
50 you." (2) Urban PCT, CSL3.  
51

52 "We found that a lot of carers are very quick to resort to the products and we're trying to get the  
53 message across that there are many things you can do before you put someone into pads." (3) Urban  
54  
55 PCT, CSL5.  
56  
57  
58  
59  
60

1  
2  
3 All of the participants agreed that to improve continence services and quality of care, current  
4 prejudices towards ageing and UI need to be recognised and addressed by patients, health  
5 professionals and service commissioners. In particular, if continence care for older people is  
6 perceived to be low priority and an unimportant health need, then investment in services and the  
7 efficacy of resultant treatments may be compromised. As one participant commented:  
8  
9

10  
11 “Commissioners of the [continence] service need to see it as important because if commissioners don’t  
12 see it as important to meet the needs of older people then they’re not going to commission a service if  
13 they think all it is is to provide pads, then that’s all they’re going to commission.” (4) Acute Trust,  
14  
15 CSL12.  
16  
17  
18  
19

### 20 21 **Continence promotion regardless of age**

22 The need to change negative attitudes towards UI and older people is closely linked with continence  
23 promotion. This, rather than pad provision, was identified by all of the participants as being a central  
24 tenet of the management of older people with UI:  
25  
26

27  
28 “Everybody should have the right to be continent so we really aim to try and get people continent  
29 whenever possible.” (5) Urban PCT, CSL14.  
30  
31

32  
33 The majority of participants, however, reported encountering problems in achieving this outcome, with  
34 several participants citing patients’ and carers’ expectations of just receiving pads from the continence  
35 service as the only treatment available to them:  
36  
37

38  
39 “People still view our service as the pad providers as much as we try and shout that we’re not just about  
40 pads.” (6) Urban PCT, CSL16.  
41

42  
43 “The expectation seems to be an expectation of pads... it isn’t any expectation that they might get  
44 better.” (7) Urban PCT, CSL15.  
45

46  
47 Two of the participants described how they were able to manage and to change patients’ and carers’  
48 expectations to resolve this issue and to produce better quality treatment outcomes for the patient:  
49  
50

51  
52 “When I hear the patient’s story, that yes they were looking for pads, I will explain to them what could be  
53 going on and that we will work with them to see if we can get them better... very few people then say, ‘I  
54 don’t want to get better’, so it depends on how you deliver it.” (8) Rural PCT, CSL6.  
55

56  
57 “If people’s first interaction regarding continence is a positive one that gives you treatment, it’s better  
58 than the first person they see saying, ‘here are some pads’. We would be able to help more people and  
59  
60



1  
2  
3 improve their symptoms rather than give them the message that you wear a pad and put up with your  
4 symptoms.” (9) Urban PCT, CSL16.  
5  
6  
7

### 8 **Investment in service capacity**

9  
10 All of the respondents highlighted a lack of service capacity as being a major challenge in delivering a  
11 quality service for older people and that investment in service capacity was required to meet the  
12 increase in service demand:  
13

14  
15 “At the moment we’ve actually had a 100 per cent increase in referrals from this time last year so some  
16 of the challenges are that obviously we haven’t changed staffing so capacity is becoming an issue.”  
17  
18 (10) Urban PCT, CSL10.  
19

20  
21  
22 This increase in service demand may, in part, be a reflection of the current financial climate, with one  
23 participant reporting an increase in the number of people self-referring into their clinic in response to  
24 the expense of buying pads. Alternatively, this increased demand for services may be a result of  
25 greater awareness and changes attitudes towards UI and continence services and/or a manifestation  
26 of success breeding success:  
27  
28  
29  
30

31 “If you’ve got what I hope is a reasonably successful service, then more people are aware of you and  
32 more people are referred to you.” (11) Urban PCT, CSL8.  
33  
34  
35  
36

37 All participants emphasised a staff shortage within their services which impacted on the quality and  
38 availability of the service they delivered. Indeed, some participants suggested that a lack of staff was  
39 associated with their difficulties in adhering to national policy, disparity in treatment outcomes and  
40 growing waiting lists, although one participant from a rural PCT did acknowledge that local geography  
41 also impacted on referral times into their service:  
42  
43  
44  
45

46 “With national policy we try as best as possible to work with it. Because of staffing levels it can be very  
47 difficult at times to adhere to the policies and not cut corners...and waiting lists go up [...] I don’t think  
48 we’re able to give the service that we should do to the elderly and it’s left to the district nurses to treat  
49 where we could go out and give specific treatments, where with the district nurses it’s a pad service.”  
50  
51 (12) Urban PCT, CSL7.  
52  
53

54 “I have 2.5 whole time equivalent staff for half a million people...we don’t have enough people...that has  
55 an impact because we’ve got referrals stacking up...we get over 1000 referrals a year. We do 40  
56  
57  
58  
59  
60

1  
2  
3 sessions per month which sounds a lot, but because of the geography it isn't because we spend a lot of  
4 time travelling and there's other stuff to do." (13) Rural PCT, CSL6.  
5  
6  
7

8 Moreover, some of the participants explicitly felt that an investment in trained staff and an integrated  
9 continence service with other health professionals was necessary to promote continence awareness  
10 and to improve the quality of patient assessments and treatment outcomes:  
11

12  
13 "If we had a proper team we could do all the assessments and offer every patient treatment. I think you  
14 need trained continence advisors, but it would be nice to have a paediatric continence advisor and it  
15 would be nice to have a physiotherapist." (14) Urban PCT, CSL7.  
16  
17  
18  
19

20 One participant, however, highlighted the difficulties they had experienced in forming an integrated  
21 service:  
22

23  
24 "We tried to go down the route of an integrated service... [but] in terms of access to a physiotherapist  
25 we've actually had difficulty within the county of finding anyone with the skills or wanting to develop  
26 those skills." (15) Urban PCT, CSL16.  
27  
28  
29  
30

31 Besides an increasing demand and a shortage of skilled staff, some participants also cited a lack of  
32 investment in clinics and equipment as being barriers to providing a quality service:  
33

34  
35 "We have a long waiting list in one particular area because there are no clinics based in that particular  
36 area." (16) Urban PCT, CSL3.  
37

38 "If we had the staff and the equipment we could improve services... we have a lack of equipment such  
39 as bladder scanners." (17) Rural PCT, CSL1.  
40  
41  
42

### 43 **Appropriate and rapid patient referral**

44  
45 Several participants in the PCTS were perplexed by the lack of appropriate and timely referrals to  
46 their services from GPs and other health professionals. This was primarily attributed to GPs' lack of  
47 knowledge about continence services, and secondly to GPs and other health professionals referring  
48 patients to the wrong services:  
49  
50

51  
52 "Some GPs will refer people into hospital services when really it's not necessary. Because of a good  
53 relationship the hospital services send them to us, so for the poor patient it means they've got two  
54 appointments instead of one." (18) Urban PCT, CSL11.  
55  
56  
57  
58  
59  
60

1  
2  
3 Indeed, one participant noted discrepancies in referral pathways based on the patient's gender:

4 "It seems to be male patients go straight to secondary care and bypass primary continence services in  
5 my area." (19) Urban PCT, CSL15.  
6  
7  
8  
9

10 The same participant also expressed concerns about perceived disparities in the quality of continence  
11 services provided to patients dependent on the referral pathway they had been allocated:

12 "For the 80 patients a month that we get there's probably 100 patients a month with continence  
13 problems who are only seen by the district nurses and they will never be seen by our service, they won't  
14 be referred to us. They will be seen and essentially, 'padded up'. They won't be investigated or given a  
15 diagnosis. So there's a very unequal service going on at the moment." (20) Urban PCT, CSL15.  
16  
17  
18  
19  
20  
21

22 For practitioners working in the acute sector there was an added sense of frustration as patients  
23 identified with UI on the wards could not be directly referred to the outpatients' continence service on  
24 discharge, but had to be referred via their GP. Although this recommendation was included on the  
25 patients' discharge letter, it was unsure as to whether or not this was acted upon by the patients' GPs:

26 "The key feature is for patients being referred in the first place, because I think that's part of the problem  
27 is that they are not referred when they've seen somebody about their bladder problems or it's been  
28 picked up on the ward. It's not always seen as important." (21) Acute Trust, CSL12.  
29  
30  
31  
32  
33  
34  
35  
36  
37  
38  
39  
40  
41  
42  
43  
44

45 The reported lack of appropriate and timely referral to continence services may seem paradoxical to  
46 the high demands of these services by patients, as found in the previous theme. The lack of  
47 appropriate and timely referrals, however, may instead be a result of the high demand and  
48 subsequent long waiting lists.  
49  
50  
51  
52  
53  
54  
55  
56  
57  
58  
59  
60

### **Patient assessment**

A full patient assessment including complete history taking, physical examination, review of medication, urinary analysis, bladder scan, vaginal and rectal examination if appropriate, was seen by all participants as being a key feature of quality continence care for older patients, as this provided the practitioner with the necessary information to make a differential diagnosis and to formulate an individual treatment plan for each patient:

1  
2  
3 “You need to do a proper assessment so that you can actually make a nursing differential diagnosis,  
4 refer if necessary, then make a proper treatment plan up for that individual and then follow them  
5 through.” (22) Urban PCT, CSL14.  
6  
7  
8

9  
10 Some participants also advocated implementing a more holistic assessment whereby patients were  
11 seen in their own home:  
12

13 “We give a full holistic assessment so that we can see patients in their own home and look at their  
14 facilities, mobility and things like that, which can quite often be part of the problem that they’ve got, so  
15 it’s more of a functional problem than anything else.” (23) Urban PCT, CSL10.  
16  
17  
18

19  
20 The majority of participants reported that within their continence clinics they adhered to NICE  
21 guidelines, which recommended that every patient is offered an assessment:  
22

23 “I think that we are following national policy quite well within the continence service. Every patient is  
24 being offered a continence assessment by a suitably qualified member of the team.” (24) Rural PCT,  
25 CSL2.  
26  
27  
28

29  
30 One participant, however, stated that they were under pressure from non-clinical managers to bypass  
31 this process. Some of the participants also reported misgivings about the disparity in the quality and  
32 thoroughness of the assessments being provided by ward nurses in hospital and by district nurses to  
33 housebound patients and to nursing home residents who were unable to attend continence clinics:  
34  
35  
36

37 “The district nurses do what we would call basic assessments for us so they would see the patients that  
38 have been referred to them, usually by the hospital if they’ve been discharged from secondary care, and  
39 it’s just basically a pad assessment.” (25) Urban PCT, CSL10.  
40  
41  
42

43 “The district nurses who go to see the patients only assess for products. They don’t look at the bigger  
44 picture.” (26) Urban PCT, CSL7.  
45  
46  
47

#### 48 **Continence education and specialist knowledge**

49

50 Having a highly trained and knowledgeable workforce responsible for delivering high quality  
51 continence care was identified by the majority of participants as being an essential feature of a quality  
52 continence service for older people. Certainly all of the participants reported having at least one  
53 specialist continence nurse on their team:  
54  
55  
56  
57  
58  
59  
60

1  
2  
3 "I think one of the key features [of the service] is to have a suitable trained nurse and a suitable team to  
4 implement assessment and treatment as opposed to just products." (27) Urban PCT, CSL7.  
5  
6  
7

8 In order to develop and improve the knowledge base and competency levels of their staff, all of the  
9 participants recognised the importance of providing and attending on-going staff training programmes,  
10 with one participant suggesting that education should be prioritised:  
11  
12

13 "Training is an integral part of the service because obviously our service is with specialist nurses who  
14 themselves access training and maintain their level of competence." (28) Urban PCT, CSL11.  
15  
16  
17

18 All of the participants recognised and acknowledged that district nurses and other health care  
19 professionals do not have the specialist skills and knowledge of the continence specialist nurse and  
20 felt that access to training for these professionals was essential to promote continence and to raise  
21 standards and parity in patient assessments:  
22  
23  
24

25 "I'd like to have more time with district nurses to bring up their level of continence assessment." (29)  
26 Urban PCT, CSL8.  
27  
28  
29

30 A wide range of training programmes was provided by the majority of participants for anyone involved  
31 with looking after someone with continence problems. Some of the participants, however, revealed  
32 that they had experienced difficulties in delivering these programmes to their targeted audiences due  
33 to continence promotion not being recognised as a priority area by the trust and to staff shortages:  
34  
35  
36  
37

38 "We've asked the question whether continence assessment training could be mandatory for district  
39 nurses but the trust aren't too happy to do that at the moment. (30) Urban PCT, CSL16.  
40  
41

42 We have a training programme but the unfortunate thing is that a lot of teams are very short-staffed so  
43 being released from training is quite difficult." (31) Urban PCT, CSL3.  
44  
45  
46

### 47 **Allocating the blame**

48 In addition to the six themes identified above, a seventh, cross-cutting theme emerged from the  
49 analysis indicative of participants' tendency to see the blame for many of the barriers to a good quality  
50 service as lying with other health professionals. Embedded within the quotations provided above is a  
51 consistent apportioning of responsibility to, for example: GPs (quotes (1), (2), (18), (19));  
52 commissioners (4); and district nurses ((12), (20), (25), (26)). When other health professionals are not  
53  
54  
55  
56  
57  
58  
59  
60

1  
2  
3 identified as the main barrier to a good quality service, family carers and/or patients themselves are  
4 seen as part of the problem (quotes (3), (5), (6)). One can question, therefore, the veracity of the  
5 service leads' perspective, which may be informed, as per the tenets of attribution theory [30] by a  
6 self-serving bias in which the cause of problems is externalised, rather than acknowledging that the  
7 potential causes of poor service outcomes may be partly due to one's own behaviour (or in this  
8 current context, a group-serving bias might be operating in order to defend the credibility of one's own  
9 professional group [31]). Where specific groups of individuals are not pinpointed as creating  
10 problems, the issue of a lack of investment in capacity, training, infrastructure, etc., is presented as a  
11 further 'external' causative factors (investment in service capacity theme). With regard to facilitating  
12 positive developments within the service, there is some evidence within the data to suggest our  
13 participants see a role for themselves for positively influencing service development (e.g., quotes  
14 (29),(30), (31)), although even here such developments are frustrated by external actors; and there is  
15 no indication of, for example, creative solutions for working with low resources. The continence  
16 service leads identify their positive impact on individual patient expectations (quote (8)), but  
17 notwithstanding that one participant saw it as a 'challenge [...] to try and persuade these staff there  
18 are things that can be done to help people and not just accept the problem.' (quote (1)), there is little  
19 evidence that the continence service leads saw themselves as responsible for advocating for a  
20 change of culture and practice around attitudes to older people and continence problems within the  
21 health service. This, despite their expressed perception that such is required.  
22  
23  
24  
25  
26  
27  
28  
29  
30  
31  
32  
33  
34  
35  
36  
37  
38  
39  
40  
41  
42

## 43 DISCUSSION

44  
45 The aim of this study was to explore the views and experiences of continence service leads in  
46 England in order to identify and improve our understanding of barriers to a good quality service and  
47 potential facilitators to develop and improve services for older people with urinary incontinence (UI).  
48 Foremost among the issues raised by the continence service leads was a failure on the part of  
49 commissioners, managers and other health professionals in recognising the problem of UI and  
50 acknowledging the importance of continence for older people and the impact it has on other areas of  
51 health, such as quality of life, tissue viability and falls [32]. Indeed some continence service leads  
52  
53  
54  
55  
56  
57  
58  
59  
60

1  
2  
3 were highly critical of current commissioning practices which focused on purchasing pad provision  
4 rather than implementation of national guidelines, and feared that their continence services may not  
5 be recommissioned by their Clinical Commissioning Group after the 2013 National Health Service  
6 (NHS) in England reorganisation.  
7  
8  
9

10  
11 All participants posited that a positive attitude towards ageing and UI was a key factor in  
12 providing a good quality continence service and that a change in the current attitudes of  
13 commissioners and other health professionals towards UI and ageing was a key factor in improving  
14 continence services for older people with UI. This perceived failure by commissioners and other  
15 health professionals in valuing the importance of continence promotion in older people may be  
16 indicative of both the low status of UI and implicit ageism. Ageism, defined as a process of  
17 systematic stereotyping of, and discrimination against, people because they are old [33], is evident  
18 amongst some doctors and other health care professionals and has been shown to impact negatively  
19 on the care older patients receive [34-38]. Taken at face value, our findings would indicate a need for  
20 change at the top level to ageist beliefs and attitudes about UI held by commissioners and other  
21 health professionals, to a standpoint that advocates candidacy for the treatment of older people with  
22 UI.  
23  
24  
25  
26  
27  
28  
29  
30  
31  
32

33 There was consensus amongst the continence service leads that there needed to be  
34 investment in the development and implementation of integrated continence services to improve  
35 service quality and the patient experience. Results from earlier research suggest that integrated  
36 continence care in primary care improved the effectiveness of continence services and was  
37 associated with high patient satisfaction levels [39-42]. Although the National Service Framework  
38 (NSF) for Older People [14] required the establishment of integrated continence services for older  
39 people by April 2004 none of the continence service leads in this study worked in an integrated  
40 service. Indeed, findings from the latest national audit of continence care only reported four fully  
41 integrated continence services in England [20]. There would appear, therefore, to be a pressing need  
42 to adopt a more dynamic approach in the provision of continence services, whereby all practice  
43 professionals are involved in the prevention, recognition, assessment and treatment of UI  
44  
45  
46  
47  
48  
49  
50  
51  
52  
53

54  
55 A lack of investment in service capacity was identified by our participants as being a key  
56 factor in failing to meet the increasing demand for continence services by older people. There may be  
57  
58  
59  
60

1  
2  
3 some reservation in accepting the notion that a barrier to a good quality service is merely the  
4 provision of further resources, and certainly such an interpretation needs to be challenged given that  
5 there is little research evidence of a simple relationship between investment and quality services.  
6  
7 However, our participants did not advocate a blanket increase in investment, rather investment  
8  
9 targeted at certain perceived needs, such as in the need for more clinics, specialised equipment and  
10  
11 staff (including staff training). Of interest is the fact that such resources were envisaged to reduce the  
12  
13 gaps in local service provision and facilitate access to and availability of continence services. Despite  
14  
15 National Guidelines there appears to be a “post code lottery” for continence services. In particular  
16  
17 clinical leads from the rural PCTs felt that a failure by their Trusts to invest in clinical infrastructure had  
18  
19 a negative impact on their ability to provide a local continence service, exacerbated by the lack of  
20  
21 public transport and the long distances patients had to travel [43]. This interplay between  
22  
23 organisational and geographical barriers to older people accessing health services in rural  
24  
25 communities is well documented. [43, 44]. For rural continence services this interaction between  
26  
27 organisation and geography was amplified by staff shortages, as most staff work part time, resulting in  
28  
29 fewer clinics being held due to the length of time spent in travelling. A better understanding of the  
30  
31 issues surrounding rural health would seem to be required by commissioners to ensure proofing of  
32  
33 rural continence services, so as to identify and support the principles underpinning best practice.

34  
35 The delivery and implementation of a full continence assessment by highly trained individuals,  
36  
37 together with continence promotion to every patient, regardless of age, were identified by all  
38  
39 continence service leads as two of the key features of a high quality and effective service for older  
40  
41 people with UI. The European Association of Urology guidelines on UI advocate that healthy older  
42  
43 people should be offered a similar range of treatment options as younger people and that treatment  
44  
45 should be individualised for frail older people [45]. Moreover, NICE guidelines specify that absorbent  
46  
47 products are not a treatment of UI but rather should be used as: a coping strategy for patients  
48  
49 awaiting definitive treatment; an add-on to on-going therapy; and long-term management of UI only  
50  
51 after other treatment options have been explored [19]. Our results, however, indicated a widespread  
52  
53 feeling of frustration amongst the continence service leads at not being able to fulfil and realise all of  
54  
55 the unmet needs for continence care services on account of patients not knowing what they want or  
56  
57 what treatments they could have, inappropriate referrals by GPs and other health professionals and a  
58  
59 lack of investment in service capacity, service integration and health professional education. The  
60



1  
2  
3 quality of continence assessments delivered to domiciliary and nursing home patients by district  
4 nurses and other health professionals, as opposed to continence nurse specialists, was also deemed  
5 to be an inferior key service characteristic which contributed to the disparity in the quality of care for  
6 older people with UI. Furthermore, in certain cases, this was compounded by GPs and other health  
7 professionals referring patients into the wrong service, delaying their referrals, or in extreme cases not  
8 referring patients at all to the continence service.  
9

10  
11  
12  
13  
14 At one level, the participants' identification of other health professionals as being 'part of the  
15 problem' with regard to the failure to deliver a high quality continence care service is borne out by  
16 evidence. For example, research indicates that GPs prefer to prescribe medications and pads due to  
17 a lack of faith in the efficacy of conservative treatment of U, and have a lack of knowledge of  
18 continence services [47-50]. Moreover, many GPs receive limited training and skills for the treatment  
19 and assessment of UI at both undergraduate and postgraduate levels [47, 49, 50] and have a  
20 substantial deficit in geriatric knowledge and training [47]. Likewise, findings from a recent nursing  
21 survey revealed gaps in nurse training and education for continence management, suggesting that  
22 nurses are not receiving sufficient support to assess and care for people with UI [51].  
23  
24  
25  
26  
27  
28  
29

30  
31 However, it is necessary to consider this 'pointing of the finger' as potentially due to other  
32 factors. Earlier we considered the self-serving bias for negative events to be attributed to external  
33 causes, but our findings could also be related to research on intergroup relations, which in general  
34 suggests that successful collaboration around a common purpose should lead to positive intergroup  
35 interactions, and less stringent group boundaries, whereas collaboration carried out under strained  
36 circumstances, and with less clarity around a common purpose, results in stronger in-group  
37 identification and more negative out-group perceptions [52]. Placed within the context of inter-  
38 professional working, it could be argued that status issues (e.g., medical versus nursing power within  
39 the National Health Service) might foster conditions whereby GPs refer directly to other medical  
40 services in acute hospitals; or that finite resources create the conditions for territorial disputes  
41 between 'specialist' continence service leads and 'generalist' health professionals such as GPs and  
42 district nurses [53, 54].  
43  
44  
45  
46  
47  
48  
49  
50  
51  
52

53 Nevertheless, if the level of frustration expressed by the continence service leads with the  
54 failing of fellow health professionals (and by extension the health service itself) reflects actual  
55 shortcomings, then one might understand why there seems within this group an apparent lack of  
56  
57  
58  
59  
60

1  
2  
3 initiative to effect real and significant improvements in service quality. If perceived control over the  
4 quality of their service is low, and this perception is enduring, then one might hypothesise the  
5 manifestation of a state of hopelessness whereby, no matter what one does, the anticipation is always  
6 of a negative outcome [55].  
7  
8  
9

### 10 11 12 13 14 15 **Strengths and limitations**

16 This study only presents views on continence services from one perspective, that of service leads,  
17 and it is entirely true that this perspective may not in all respects correspond with the perspectives of,  
18 for example, GPs or commissioners. While comparison across different stakeholders would have  
19 been welcome, space restrictions would have precluded a detailed analysis of the perspective of a  
20 single stakeholder group as provided in this study. Further research is required to establish the  
21 perspectives of other stakeholder groups on the barriers to, and facilitators of, a quality continence  
22 care service. While there are always limits on the extent to which one can generalise the results of  
23 qualitative research, our findings have good face validity as the main themes identified in our  
24 analyses are reflected in relevant studies [56]. Our sampling strategy ensured a good representation  
25 of participants from across the range of former SHAs, while the use of qualitative interviews was the  
26 optimal method for this study as it allowed participants to discuss in detail and to express openly their  
27 opinions on the barriers to a successful service and how continence services for older people could  
28 be improved. Data were only collected in England as healthcare in Wales, Scotland and Northern  
29 Ireland is devolved and has no internal healthcare market, and so the study has a limited contribution  
30 to the debate on continence management in these areas of the UK.  
31  
32  
33  
34  
35  
36  
37  
38  
39  
40  
41  
42  
43  
44  
45

### 46 **CONCLUSION**

47 From the perspective of continence service leads, patient assessment and continence promotion  
48 regardless of age, rather than pad provision, were identified as facilitators of the delivery of a high  
49 quality service for older people with UI, embedded within a change of attitudes to older people and UI  
50 among commissioners and other health professionals. More rapid and appropriate patient referral  
51 pathways, investment in service capacity, (including trained staff and facilities), strengthened inter-  
52 service collaborations and a higher profile for UI within medical and nursing training were specified as  
53  
54  
55  
56  
57  
58  
59  
60

1  
2  
3 being important for delivering an equitable and high quality continence service. Further research is  
4 required to determine whether change within these identified priority areas may lead to the raising of  
5 standards in continence care for older people with UI. There should, however, be concern that,  
6  
7 overwhelmingly, the participants in our study identified problems in the delivery of a good quality  
8 continence care service as located within the behaviours and attitudes of other health professionals,  
9 the health service in general, or even family carers or patients themselves. While potentially a true  
10 reflection of the situation, there is also an alternative interpretation that the pervasiveness of this  
11 blame allocation is at least partly due to our participants being members of a perceived low-status  
12 group within the NHS, who are treating a group of patients also perceived to be low-status – an issue  
13 highlighted by the participants themselves. Addressing this latter situation, while challenging, might  
14 be regarded as of foremost importance: not just in terms of its direct impact on improving service  
15 quality as suggested by our participants, but also in terms of its potential indirect impact in reducing  
16 inter-professional blame-allocation and empowering specialist continence nurses to effect meaningful  
17 change for themselves.  
18  
19  
20  
21  
22  
23  
24  
25  
26  
27  
28  
29  
30  
31

32 **FUNDING** Funding was received from the New Dynamics of Ageing Programme, led by the Economic  
33 & Social Research Council, UK (grant number RES-353-25-0010).  
34  
35  
36  
37

38 **COMPETING INTERESTS** None. All authors have completed the ICMJE uniform disclosure form at  
39 [icmje.org/coi\\_disclosure.pdf](http://icmje.org/coi_disclosure.pdf) (available on request from the corresponding author) and declare: no  
40 support from any organisation for the submitted work; no financial relationships with any organisations  
41 that might have an interest in the submitted work in the previous three years; no other relationships or  
42 activities that could appear to have influenced the submitted work.”  
43  
44  
45  
46  
47  
48  
49  
50  
51  
52  
53  
54  
55  
56  
57  
58  
59  
60

## REFERENCES

1. Abrams P, Cardozo L, Fall M, et al. A. The standardisation of terminology in lower urinary tract function: report from the standardisation sub-committee of the International Continence Society. *Neurourol Urodyn* 2002;21:167-178.
2. Perry S, Shaw C, Assassa P, et al. An epidemiological study to establish the prevalence of urinary symptoms and felt need in the community: the Leicestershire MRC Incontinence Study. *J Pub Health Med* 2000;22(3):427-434.
3. McGrother CW, Donaldson MMK, Shaw C, et al. Storage symptoms of the bladder: prevalence, incidence and the need for services in the UK. *BJU Int* 2004;93:763-769.
4. DuBeau CE, Kuchel GA, Johnson II T, et al. *Neurourol Urodyn* 2010;29:165-178.
5. Drennan VM, Rait G, Cole L, et al. The prevalence of incontinence in people with cognitive impairment or dementia living at home: A Systematic review. *Neurourol Urodyn* 2013;32:314-324.
6. Debruyne FM, Heesakkers JP. Clinical and socioeconomic relevance of overactive bladder. *Urol* 2004;63:42-44.
7. Hunskaar S, Arnold EP, Burgio K, et al. Epidemiology and natural history of urinary incontinence. *Int Urogynecol J Pelvic Floor Dysfuncy* 2000;11(5):301-319.
8. Hunskaar S, Lose G, Sykes D, et al. The prevalence of urinary incontinence in women in four European countries. *BJU* 2004;93:324-330.
9. Bartoli S, Aguzzi G, Tarricone R. Impact on quality of life of urinary incontinence and overactive bladder: a systematic literature review. *Urol* 2010;745(3):491-500.
10. Thom DH, Haan MN, van den Eeden SK. Medically recognised urinary incontinence and the risks of hospitalisation, nursing home admission and mortality. *Age Ageing* 1997;26(5):367-374.
11. Coyne KS, Zhou Z, Thompson C et al. The impact of health-related quality of life of stress, urge and mixed urinary incontinence. *BJU Int* 2003;92(9):731-735.
12. Martin C, Williams C, O'Neill D. Retrospective analysis of attitudes to ageing in the *Economist*: apocalyptic demography for opinion formers? *BMJ* 2009;339:1435-1437.
13. Buckley BS, Lapitan MCM. Prevalence of urinary incontinence in men, women and children – current evidence: findings of the fourth international consultation on incontinence. *Urol* 2010;76(2):265-270.

- 1  
2  
3 14. Wagg A. Continence, incontinence and the ageing male. 2010.  
4  
5 [http://www.bgs.org.uk/index.php?option=com\\_content&view=article&id=242:continencecontinenc](http://www.bgs.org.uk/index.php?option=com_content&view=article&id=242:continencecontinenc)  
6  
7 [ewagg&catid=51:publications&itemid=147](http://www.bgs.org.uk/index.php?option=com_content&view=article&id=242:continencecontinenc)
- 8  
9 15. Irwin DE, Mungapen L, Milsom I, et al. The economic impact of overactive bladder syndrome in  
10  
11 six Western countries. *BJU Int* 2008;103(2):202-209.
- 12  
13 16. Mitteness LS, Barker JC. Stigmatizing a “normal” condition: urinary incontinence in late life. *Med*  
14  
15 *Anthropol Q* 1995;9(2):199-210.
- 16  
17 17. Fonda D, Abrams P. Cure sometimes, help always – A “Continence Paradigm” for all ages and  
18  
19 conditions. *Neurourol Urodyn* 2006;25:290-292.
- 20  
21 18. Martin JL, Williams KS, Abrams AS, et al. Systematic review and evaluation of methods of  
22  
23 assessing urinary incontinence. *HTA* 2006;10(6):1-4.
- 24  
25 19. NICE CG 40 Urinary incontinence in women 2006 <http://guidance.nice.org.uk/CG40>
- 26  
27 20. Royal College of Physicians National Audit of Continence Care 2010  
28  
29 <http://www.rcplondon.ac.uk/resources/national-audit-continence-care>
- 30  
31 21. Teddlie C, Yu F. Mixed methods sampling: a typology with examples. *J Mixed Methods Res*  
32  
33 2007;1:77-100.
- 34  
35 22. Department of Health. Good practice incontinence services. HMSO:London, 2000.
- 36  
37 23. Department of Health. National service framework for older people. HMSO:London, 2001.
- 38  
39 24. Ritchie J, Spencer L. Qualitative data analysis for applied research policy. In: A Bayman, RG  
40  
41 Burgess (eds.), *Analysing Qualitative Data*, London: Routledge, 1993, pp. 173-194.
- 42  
43 25. Ward DJ, Furber C, Tierney S. Using Framework Analysis in nursing research: a worked  
44  
45 example. *J Advanced Nurs* 2013 doi: 10.1111/jan.12127
- 46  
47 26. Lacey A, Luff D. Qualitative data analysis 2007 [www.rds-yh.nihr.ac.uk](http://www.rds-yh.nihr.ac.uk)
- 48  
49 27. Pope C, Ziebland S, Mays N. Qualitative research in health care. *BMJ* 2000;320:114-116.
- 50  
51 28. Guest G, Bunce A, Johnson L. How many interviews are enough? An experiment with Data  
52  
53 Saturation and Variability. *Field Methods* 2006;18:59-82.
- 54  
55 29. Francis JJ, Johnston M, Robertson C, et al. What is adequate sample size? Operationalising  
56  
57 data saturation for theory-based interview studies. *Psychol Health* 2010;25:1229-1245.
- 58  
59 30. Zuckerman M. Attribution of success and failure revisited, or: the motivational bias is alive and  
60  
61 well in attribution theory. *J Personality* 1979;47:245-87.

- 1  
2  
3 31. Hewston M. The 'ultimate attribution error'. A review of the literature on intergroup causal  
4 attribution. *Eur J Soc Psychol* 1990;20:311-35.
- 5  
6 32. Foley AL, Loharuka S, Barrett JA, et al. Association between the geriatric giants of urinary  
7 incontinence and falls in older people using data from the Leicestershire MRC incontinence study.  
8 *Age Ageing* 2012;41:35-40.
- 9  
10 33. Cohen E. The complex nature of ageism: what is it? Who does it? Who perceives it? *Gerontol*  
11 2001;41:576-577.
- 12  
13 34. Lothian K, Philip I. Maintaining the dignity and autonomy of older people in the healthcare setting.  
14 *BMJ* 2001;322:668-670.
- 15  
16 35. Gunderson A, Tomkpwiak J, Menachemi N, et al. Rural physicians' attitudes towards the elderly:  
17 evidence of ageism? *Q Manage Health Care* 2005; 14:167-176.
- 18  
19 36. Gallagher S, Bennett KM, Halford JCG. A comparison of acute and long-term health-care  
20 personnel's attitudes towards older adults. *Int J Nurs Pract* 2006;12:273-279.
- 21  
22 37. Leung S, Lo Giudice D, Schwarz J, et al. Hospital doctors' attitudes towards older people. *Int*  
23 *Med J* 2011;41:308-314.
- 24  
25 38. Courtney M, Tong S, Walsh A. Acute-care nurses' attitudes towards older patients: a literature  
26 review. *Int J Nurs Pract* 2000;6:62-69.
- 27  
28 39. Wagg A, Lowe D, Peel P, Potter J. Do self-reported 'integrated' continence services provide high  
29 quality continence care? *Age Ageing* 2009;38(6):730-733.
- 30  
31 40. Bayliss V, Salter L. Pathways for evidence-based continence care. *Nurs Stand* 2004;19:45-51.
- 32  
33 41. Williams K, Assassa R, Cooper N, Turner D, Shaw C, Abrams K, et al. Clinical and cost-  
34 effectiveness of a new nurse-led continence service: a randomised controlled trial. *Br J Gen*  
35 *Pract* 2005;55:696-703.
- 36  
37 42. Jha S, Moran P, Blackwell A, et al. Integrated care pathways: The way forward for continence  
38 services? *Euro J Obs Gynecol Repo Biol* 2007;134:120-125.
- 39  
40 43. Mungall I. Trend towards centralisation of hospital services and its effects on access to care for  
41 rural and remote communities in the UK. *Rural Remote Health* 2005;5(2):390.
- 42  
43 44. European Commission. Quality in and equality of access to healthcare. European Commission  
44 2008.

- 1  
2  
3 45. Commission for Healthcare Audit and Inspection. Living well in later life. A review of progress  
4 against national standard framework for older people 2006.  
5  
6  
7 46. Schroder A, Abrams P, Andersson K-E, et al. Guidelines on urinary incontinence. European  
8 Association of Urology 2009.  
9  
10 47. Grealish M, O'Dowd TC. General practitioners and women with urinary incontinence. Br J GP  
11 1998;48:975-978.  
12  
13 48. Shaw C, Atwell C, Wood F, Brittain K, Williams K. A qualitative study of the assessment and  
14 treatment of incontinence in primary care. Fam Pract 2007;24:461-467.  
15  
16 49. Gerrits M, Avery T, Largo-Janssen ALM. Urinary incontinence management in women: audit in  
17 general practice. J Eval Clin Pract 2008;14:836-838.  
18  
19 50. van Gerwen M, Schellevis F, Lagro-Janssen A. Management of urinary incontinence in general  
20 practice: data from the second Dutch national survey. J Eval Clin Pract 2009;15:341-345.  
21  
22 51. Nursing Times Survey 2009 [http://www.nursingtimes.net/nurses-must-receive-sufficient-](http://www.nursingtimes.net/nurses-must-receive-sufficient-continenence-education-and-training/5001846.article)  
23 [continenence-education-and-training/5001846.article](http://www.nursingtimes.net/nurses-must-receive-sufficient-continenence-education-and-training/5001846.article)  
24  
25  
26  
27  
28 52. Brown RJ, Wade GS. Superordinate goals and intergroup behaviour: the effects of role ambiguity  
29 and status on intergroup attitudes and task performance. Eur J Soc Psychol 1987;17:131-142.  
30  
31 53. Abbot A. 1988. The system of professions. An essay on the division of expert labor. Chicago:  
32 University of Chicago Press.  
33  
34 54. Hughes E. 1993. Licence and mandate. In Walmsley, J. et al. (eds.) Health, welfare and practice.  
35 Reflecting on roles and relationships (pp. 21-24). London:Sage.  
36  
37 55. Abramson L Y, Metalsky G I, Alloy LB. (1989). Hopelessness depression: A theory-based  
38 subtype of depression. Psychol Rev 1989;96:358-372.  
39  
40 56. Cheater FM. Overcoming the barriers to optimum continence care: the need for an expanded  
41 approach to implementation. Int J Older People Nurs 2009;4:70-75.  
42  
43  
44  
45  
46  
47  
48  
49  
50  
51  
52  
53  
54  
55  
56  
57  
58  
59  
60

1  
2  
3  
4  
5  
6  
7  
8  
9  
10  
11  
12  
13  
14  
15  
16  
17  
18  
19  
20  
21  
22  
23  
24  
25  
26  
27  
28  
29  
30  
31  
32  
33  
34  
35  
36  
37  
38  
39  
40  
41  
42  
43  
44  
45  
46  
47  
48  
49  
50  
51  
52  
53  
54  
55  
56  
57  
58  
59  
60

For peer review only



1  
2  
3 **Improving continence services for older people from the service-providers' perspective: a**  
4 **qualitative interview study**  
5  
6  
7  
8  
9

10 **Abstract**  
11

12 **Objective:** To examine in depth the views and experiences of continence service leads in England on  
13 key service and continence management characteristics **in order to identify and improve our**  
14 **understanding of barriers to a good quality service and potential facilitators to develop and**  
15 **improve services for older people with urinary incontinence (UI).**  
16  
17  
18  
19

20 **Design:** Qualitative semi-structured interviews using a purposive sample recruited across 16  
21 continence services.  
22  
23  
24

25 **Setting:** Three acute and 13 primary care National Health Service Trusts in England.  
26  
27

28 **Participants:** Sixteen continence service leads in England actively treating and managing older  
29 people with UI.  
30  
31

32 **Results:** **In terms of barriers to a good quality service**, participants highlighted a failure on the part  
33 of commissioners, managers and other health professionals in recognising the problem of UI and in  
34 acknowledging the importance of continence for older people, and prevalent negative attitudes  
35 towards continence and older people. Patient assessment and continence promotion regardless of  
36 age, rather than pad provision, were identified as important steps for **a good quality service** for older  
37 people with UI. More rapid and appropriate patient referral pathways, investment in service capacity,  
38 e.g. more trained staff, and strengthened inter-service collaborations and a higher profile within  
39 medical and nurse training were specified as being important facilitators for delivering an equitable  
40 and high quality continence service. There is a need, however, to consider the accounts given by our  
41 participants as perhaps serving the interests of their professional group within the context of inter-  
42 professional work.  
43  
44  
45  
46  
47  
48  
49  
50  
51  
52

53 **Conclusions:** **Our data point to important barriers to and facilitators of a good quality service**  
54 **for older people with UI, from the perspective of continence service leads. Further research**  
55  
56  
57  
58  
59  
60

1  
2  
3 should address the views of other stakeholders, and explore options for the empirical  
4  
5 evaluation of the effectiveness of identified service facilitators.  
6  
7  
8  
9  
10  
11  
12  
13  
14  
15  
16  
17  
18  
19  
20  
21  
22  
23  
24  
25  
26  
27  
28  
29  
30  
31  
32  
33  
34  
35  
36  
37  
38  
39  
40  
41  
42  
43  
44  
45  
46  
47  
48  
49  
50  
51  
52  
53  
54  
55  
56  
57  
58  
59  
60

For peer review only

## Article Summary

### Article focus

- Urinary incontinence affects both men and women, but the quality of continence care provided is worse for patients aged 65 years and over compared to younger patients.
- To explore the views and experiences of continence service leads in England **to identify and improve our understanding of barriers to a good quality service and potential facilitators to develop and improve services for older people with urinary incontinence (UI).**

### Key messages

- Patient assessment and continence promotion regardless of age, rather than pad provision are the key issues for **improving continence services** for older people with UI.
- Improving attitudes towards continence and older people, together with more rapid and appropriate patient referral pathways, strengthened inter-service collaborations, investment in service capacity and a higher profile of UI within medical and nurse training may lead to the raising of standards in continence care for older people with urinary incontinence.

### Strengths and limitations

- This study directly asked continence service leads in England to identify key features of a high quality and efficacious continence service for older people with urinary incontinence.
- Our sampling strategy ensured a good representation of participants and the use of qualitative interviews was the optimal method for this study as it allowed participants to discuss in detail and to express openly their opinions.
- Data from other stakeholder groups in continence care was not collected.
- Data were only collected in England as healthcare in Wales, Scotland and Northern Ireland is devolved and has no internal market. .

## INTRODUCTION

Urinary incontinence (UI) is a common condition that affects both men and women **and is defined by the International Continence Society as, ‘the complaint of any involuntary leakage of urine’ [1]. Findings from an earlier epidemiological study to establish the prevalence of urinary symptoms in community-dwelling adults in Great Britain revealed that approximately 23% of women and 8.7% of men over the age of 40 years have urinary symptoms and that the prevalence and severity of symptoms increase with age [2-4]. For people with cognitive impairment or dementia living at home results from a recent systematic review reported that the prevalence of UI ranged from 1.1% in a general community population to 38% in those receiving home care services [5].** Direct costs of UI to the National Health Service (NHS) are reported to be greater than those associated with common chronic illnesses, such as coronary care and cancer care, with these costs expected to rise due to the increase in the ageing population [6].

**UI can have a substantial impact on the physical, psychological, social and economic well-being of the affected individual and their families [7-9], as UI symptoms are associated with significant morbidity and an increased risk of hospitalisation and admission to institutional care [10, 11].** Furthermore, negative attitudes towards older people (e.g. burden on society) and UI (e.g. distaste) are common in both society and health care, and impact on the provision of health care services [12]. Although a higher prevalence of UI is associated with greater age [2, 3, 13-15], UI should not be considered a normal part of ageing as UI is a treatable condition [16]. **According to Fonda and Abrams’ “Continence Paradigm” for defining incontinence and continence management for all ages, UI can be controlled by behavioural treatments, medications or with toileting assistance or contained with pads or appliances [17].** Left untreated, however, UI is a chronic rather than a self-limiting condition, with a propensity to worsen over time.

**UI usually presents and is identified in primary care settings by General Practitioners (GPs) and nurses, although the pathways to diagnostic assessment can be inconsistent with some individuals being referred directly to a variety of specialists in secondary care (e.g. physiotherapists, gynaecologists, urologists, geriatricians or specialist nurses based in secondary care) without any assessment or treatment [18].** Continence services in England are provided by GPs, Acute Trusts, private providers for the NHS, alternative providers, e.g.

1  
2  
3 social enterprises and primary care providers; with treatment being delivered in hospitals, GP  
4 surgeries, nursing and care homes, community clinics and primary care centres [18].  
5  
6 Generally, however, symptomatic diagnoses occur in primary care and condition-specific in  
7  
8 secondary care.  
9

10  
11 According to the National Institute for Health and Clinical Excellence (NICE) guidelines  
12  
13 for commissioning a urinary continence service, primary care and community teams are  
14  
15 expected to have trained professionals able to perform initial assessment and conservative  
16  
17 management of UI and/ or a referral pathway to a specialist continence service [19]. In  
18  
19 addition, patients presenting with UI and symptoms indicating a more complex condition  
20  
21 should have access to a specialist continence service that employs, amongst others,  
22  
23 specialist continence nurse advisers (registered nurses with extensive training up to degree  
24  
25 level in continence care and able to work as independent practitioners) and specialist  
26  
27 physiotherapists [18]. Despite these recommendations, the latest National Audit of Continence  
28  
29 Care [20] found that poor integration of continence services across the hospital, primary care, mental  
30  
31 health and care home settings, resulted in disjointed care for UI patients and their carers, variable  
32  
33 levels of adherence to NICE guidelines, and gaps in organisational standards and clinical care.  
34  
35 Furthermore, quality of care was found to worse for patients aged 65 years and over compared to  
36  
37 younger patients.

38  
39 Whilst audit is a tool able to measure the quality of care and services against agreed  
40  
41 standards, it is unable to provide new knowledge in order to determine best practice. To date, the  
42  
43 contribution made by service characteristics and the management of continence at both the service  
44  
45 and personal level to attain **optimal quality of care for older people with UI** has not been  
46  
47 addressed. To put this into context, as part of a programme of research tackling ageing continence  
48  
49 through theory, tools and technology (TACT3), the **aims of the** qualitative study described in this  
50  
51 paper **were to explore the views and experiences of continence service leads (specialists) in**  
52  
53 **order to identify and improve our understanding of barriers to a good quality service and**  
54  
55 **potential facilitators to develop and improve services for older people with urinary**  
56  
57 **incontinence (UI). Such knowledge may be important to the development of patient care and**  
58  
59 **the design of professional education programmes and to inform service commissioners.**  
60

## METHODS

### Design

The study had a qualitative design, incorporating semi-structured telephone interviews, with purposive sampling of participants via a stratified sampling frame based on all former English Strategic Health Authorities (SHA).

### Participants and setting

This study was targeted at **senior and specialist continence nurse practitioners acting as continence service leads** in NHS Trusts in England providing a continence service for community-dwelling people aged 50 years and over. **We targeted the leads of specialist continence services rather than GPs or District Nurses because they are: (1) expert practitioners with extensive training in continence care and; (2) front line staff in delivering continence services.**

A non-random sampling strategy was used to recruit a purposive maximum-variation sample of continence service leads from urban and rural NHS Trusts located within the SHAs. As far as possible when employing a qualitative design, this approach would provide the broadest representation of continence service leads from across England, ensuring that a wide range of perspectives would be present in the dataset so that the issues of continence problems could be considered from all angles prior to identifying the common themes evident in the data [21]. An information email inviting expressions of interest was sent to 40 continence service leads; four in each of the geographical areas of the SHAs. Inclusion criteria were: (1) service provided a continence service for people aged 50 years or older; (2) participants' contact time with patients > 60% of their working week so that they have valuable knowledge of working within their continence service. Twenty-six out of the 40 service leads originally approached who met our inclusion criteria agreed in principal to be interviewed. Ten potential participants withdrew from the study leaving a sample size of 16. The most common reasons for withdrawal from the study were: (1) due to Trust reorganisation potential participants did not have the time to participate in the study and; (2) loss of contact due to people leaving their post and/or not responding to follow up emails. **Due to the time constraints for this study and the length of time required to apply for and gain NHS research governance**

1  
2  
3 **approval, we did not replace the original ten participants who withdrew from the study.** Three  
4 participants were located in acute trusts, three participants were located in rural primary care trusts  
5 (PCT) and ten participants were located in urban PCTs.  
6  
7  
8  
9  
10

## 11 **Interviews**

12 Data were collected by individual in-depth, semi-structured telephone interviews. A topic guide was  
13 developed by the research team from the recommendations reported in the Good Practice in  
14 Contenance Services document [22], the National Service Framework (NSF) for Older People [23],  
15 NICE guidelines [19] and the National Audit of Contenance Care [20]. Topics covered included the  
16 nature of service provision and priorities, challenges in meeting these priorities, the impact of national  
17 policy on service provision, the key features of service provision, how services could be improved and  
18 how trusts could improve continence care for older people. Interviews were conducted between April  
19 2011 and January 2012 at a time convenient for the participant. The average interview time was  
20 approximately 45 minutes. Oral consent from the participants was recorded at the beginning of the  
21 interviews and all participants were offered a hard copy of the consent form. Interview data were  
22 collected confidentially and digitally recorded within the university by a member of the research team  
23 and transcribed. During the interviews, first names only were referred to and names were not  
24 recorded in the transcriptions.  
25  
26  
27  
28  
29  
30  
31  
32  
33  
34  
35  
36  
37  
38  
39  
40  
41

## 42 **Analysis**

43 The interview transcripts were analysed using **Framework Analysis [24], which is an approach to**  
44 **qualitative data analysis developed by social policy researchers in the UK and increasingly**  
45 **used in health care research [26]. Framework Analysis is a pragmatic approach for applied**  
46 **research, developed to address specific real-world questions and with less focus on**  
47 **producing new theory than other approaches to qualitative data analysis, such as grounded**  
48 **theory [26]. In accordance with Framework Analysis, the data analysis followed a five stage**  
49 **process [24, 26, 27]:**  
50  
51  
52  
53  
54  
55  
56  
57  
58  
59  
60

- 1  
2  
3 1. **Familiarisation: becoming familiar with and getting an overview of the richness, depth and**  
4 **diversity of material gathered.**
- 5  
6 2. **Identification of the thematic framework: identifying key issues, concepts and themes**  
7 **according to which the data can be examined by combining a *priori* issues derived from**  
8 **key concepts in the literature and the aims of the study (deductive analysis) with**  
9 **categories derived from the data (inductive analysis).**
- 10  
11 3. **Indexing: a process of applying the thematic framework to the data, using codes to identify**  
12 **specific pieces of data that correspond with differing themes (in other qualitative analysis**  
13 **approaches often called 'coding').**
- 14  
15 4. **Charting: creating charts with headings and subheadings drawn from the thematic**  
16 **framework; in this study data were organised into a chart, using Excel, with participants as**  
17 **rows and emerging themes as columns.**
- 18  
19 5. **Mapping and interpretation: pull together key characteristics of the data, and map and**  
20 **interpret the data set as a whole.**

21  
22  
23  
24  
25  
26  
27  
28  
29  
30 Each stage of the analysis was conducted by the first author. To improve inter-rater  
31 reliability a selection of transcripts were reviewed by another member of the team (LD) to check  
32 for bias and alternative interpretation of the data. Revisiting the interview transcripts, all  
33 themes were represented within the first 12 interviews, with an indication that data  
34 saturation had been achieved as no new themes emerged from the remaining interviews  
35 [28, 29]. In the presentation of the results, each quote is sequentially numbered, and attributed to  
36 the Continence Service Lead (CSL) interviewed via an identification code, allocated in the order in  
37 which the continence service leads were interviewed.  
38  
39  
40  
41  
42  
43  
44  
45  
46  
47

#### 48 Ethics

49  
50 A favourable opinion was obtained from NHS Bradford Research Ethics Committee (Ref No.:  
51 10/H1302/93) and research governance approval obtained from the primary care and acute trusts in  
52 each location where the continence service leads worked.  
53  
54  
55  
56  
57  
58  
59  
60



## RESULTS

Sixteen continence service leads participated in the study. There were more women (n = 14) than men (n = 2). Two participants were Clinical Lead Continence Nurses, six participants were Service Leads, two participants were Continence Nurse Specialists, two participants were Service Managers, three participants were Lead Specialist Continence Nurses and one participant was a Team and Clinical Facilitator. All respondents had spent a significant part of their working lives as continence specialists (mean 9 years, range 1 to 15 years) and the time in their current post varied from 1 to 15 years, with a mean of 6 years.

From the analysis, six themes emerged that related to barriers to a good quality service and potential facilitators to develop and improve services for older people with urinary incontinence (UI), with an additional seventh cross-cutting theme. . These six themes were: Changes in attitudes towards older people and UI; Investment in service capacity; Appropriate and rapid patient referral; Patient assessment; Continence promotion regardless of age; Continence education and specialist knowledge; and the seventh cross-cutting theme, Allocating the blame. Each theme is considered in detail below.

### Changes in attitudes towards older people and UI

Having a negative attitude towards UI and older people was identified by all participants as a key barrier to delivering good quality care. The following comment typifies this:

“There’s GPs [General Practitioners] out there still who will say to Mrs. Jones, ‘well you’re 85, you’ve had three children, what can you expect?’ The challenge is to try and persuade these staff there’re things that can be done to help people and not just accept the problem.” (1) Urban PCT, CSL4.

It was felt by a number of participants that these negative attitudes towards older people with UI were reinforced by other health professionals’, carers’ and patients’ lack of knowledge and understanding about UI, its treatment and the role of continence services in providing treatment for UI:

“If we were to ask a GP, ‘What does the continence service do?’ they probably wouldn’t be able to tell you.” (2) Urban PCT, CSL3.

1  
2  
3 “We found that a lot of carers are very quick to resort to the products and we’re trying to get the  
4 message across that there are many things you can do before you put someone into pads.” (3) Urban  
5 PCT, CSL5.  
6  
7  
8

9  
10 All of the participants agreed that to improve continence services and **quality of care**, current  
11 prejudices towards ageing and UI need to be recognised and addressed by patients, health  
12 professionals and service commissioners. In particular, if continence care for older people is  
13 perceived to be low priority and an unimportant health need, then investment in services and the  
14 efficacy of resultant treatments may be compromised. As one participant commented:  
15  
16  
17

18 “Commissioners of the [continence] service need to see it as important because if commissioners don’t  
19 see it as important to meet the needs of older people then they’re not going to commission a service if  
20 they think all it is is to provide pads, then that’s all they’re going to commission.” (4) Acute Trust,  
21 CSL12.  
22  
23  
24  
25  
26  
27

### 28 **Continence promotion regardless of age**

29 **The need to change negative attitudes towards UI and older people is closely linked with**  
30 **continence promotion.** This, rather than pad provision, was identified by all of the participants as  
31 being a central tenet of the management of older people with UI:  
32  
33

34 “Everybody should have the right to be continent so we really aim to try and get people continent  
35 whenever possible.” (5) Urban PCT, CSL14.  
36  
37  
38  
39

40 The majority of participants, however, reported encountering problems in achieving this outcome, with  
41 several participants citing patients’ and carers’ expectations of just receiving pads from the continence  
42 service as the only treatment available to them:  
43  
44

45 “People still view our service as the pad providers as much as we try and shout that we’re not just about  
46 pads.” (6) Urban PCT, CSL16.  
47  
48

49 “The expectation seems to be an expectation of pads... it isn’t any expectation that they might get  
50 better.” (7) Urban PCT, CSL15.  
51  
52  
53

54 Two of the participants described how they were able to manage and to change patients’ and carers’  
55 expectations to resolve this issue and to produce better quality treatment outcomes for the patient:  
56  
57  
58  
59  
60

1  
2  
3 “When I hear the patient’s story, that yes they were looking for pads, I will explain to them what could be  
4 going on and that we will work with them to see if we can get them better... very few people then say, ‘I  
5 don’t want to get better’, so it depends on how you deliver it.” (8) Rural PCT, CSL6.

6  
7 “If people’s first interaction regarding continence is a positive one that gives you treatment, it’s better  
8 than the first person they see saying, ‘here are some pads’. We would be able to help more people and  
9 improve their symptoms rather than give them the message that you wear a pad and put up with your  
10 symptoms.” (9) Urban PCT, CSL16.

### 16 **Investment in service capacity**

17 All of the respondents highlighted a lack of service capacity as being a major challenge in delivering a  
18 quality service for older people and that investment in service capacity was required to meet the  
19 increase in service demand:  
20

21  
22  
23 “At the moment we’ve actually had a 100 per cent increase in referrals from this time last year so some  
24 of the challenges are that obviously we haven’t changed staffing so capacity is becoming an issue.”  
25  
26 (10) Urban PCT, CSL10.

27  
28  
29  
30 This increase in service demand may, in part, be a reflection of the current financial climate, with one  
31 participant reporting an increase in the number of people self-referring into their clinic in response to  
32 the expense of buying pads. Alternatively, this **increased demand for services may be a result of**  
33  
34  
35  
36  
37 **greater awareness and changes attitudes towards UI and continence services and/or a**  
38 manifestation of success breeding success:

39  
40 “If you’ve got what I hope is a reasonably successful service, then more people are aware of you and  
41 more people are referred to you.” (11) Urban PCT, CSL8.

42  
43  
44  
45 All participants emphasised a staff shortage within their services which impacted on the quality and  
46 availability of the service they delivered. Indeed, some participants suggested that a lack of staff was  
47 associated with their difficulties in adhering to national policy, disparity in treatment outcomes and  
48 growing waiting lists, although one participant from a rural PCT did acknowledge that local geography  
49 also impacted on referral times into their service:  
50

51  
52  
53  
54 “With national policy we try as best as possible to work with it. Because of staffing levels it can be very  
55 difficult at times to adhere to the policies and not cut corners...and waiting lists go up [...] I don’t think  
56 we’re able to give the service that we should do to the elderly and it’s left to the district nurses to treat  
57  
58  
59  
60

1  
2  
3 where we could go out and give specific treatments, where with the district nurses it's a pad service."

4 (12) Urban PCT, CSL7.

5  
6 "I have 2.5 whole time equivalent staff for half a million people...we don't have enough people...that has  
7  
8 an impact because we've got referrals stacking up...we get over 1000 referrals a year. We do 40  
9  
10 sessions per month which sounds a lot, but because of the geography it isn't because we spend a lot of  
11  
12 time travelling and there's other stuff to do." (13) Rural PCT, CSL6.

13  
14  
15 Moreover, some of the participants explicitly felt that an investment in trained staff and an integrated  
16  
17 continence service with other health professionals was necessary to promote continence awareness  
18  
19 and to improve the quality of patient assessments and treatment outcomes:

20 "If we had a proper team we could do all the assessments and offer every patient treatment. I think you  
21  
22 need trained continence advisors, but it would be nice to have a paediatric continence advisor and it  
23  
24 would be nice to have a physiotherapist." (14) Urban PCT, CSL7.

25  
26  
27 One participant, however, highlighted the difficulties they had experienced in forming an integrated  
28  
29 service:

30 "We tried to go down the route of an integrated service... [but] in terms of access to a physiotherapist  
31  
32 we've actually had difficulty within the county of finding anyone with the skills or wanting to develop  
33  
34 those skills." (15) Urban PCT, CSL16.

35  
36  
37 Besides an increasing demand and a shortage of skilled staff, some participants also cited a lack of  
38  
39 investment in clinics and equipment as being barriers to providing a quality service:

40 "We have a long waiting list in one particular area because there are no clinics based in that particular  
41  
42 area." (16) Urban PCT, CSL3.

43  
44 "If we had the staff and the equipment we could improve services... we have a lack of equipment such  
45  
46 as bladder scanners." (17) Rural PCT, CSL1.

#### 47 48 49 **Appropriate and rapid patient referral**

50  
51 **Several participants in the PCTS** were perplexed by the lack of appropriate and timely referrals to  
52  
53 their services from GPs and other health professionals. This was primarily attributed to GPs' lack of  
54  
55 knowledge about continence services, and secondly to GPs and other health professionals referring  
56  
57 patients to the wrong services:  
58  
59  
60

1  
2  
3 “Some GPs will refer people into hospital services when really it’s not necessary. Because of a good  
4 relationship the hospital services send them to us, so for the poor patient it means they’ve got two  
5 appointments instead of one.” (18) Urban PCT, CSL11.  
6  
7  
8

9  
10 Indeed, one participant noted discrepancies in referral pathways based on the patient’s gender:

11 “It seems to be male patients go straight to secondary care and bypass primary continence services in  
12 my area.” (19) Urban PCT, CSL15.  
13  
14  
15

16  
17 The same participant also expressed concerns about perceived disparities in the quality of continence  
18 services provided to patients dependent on the referral pathway they had been allocated:  
19

20 “For the 80 patients a month that we get there’s probably 100 patients a month with continence  
21 problems who are only seen by the district nurses and they will never be seen by our service, they won’t  
22 be referred to us. They will be seen and essentially, ‘padded up’. They won’t be investigated or given a  
23 diagnosis. So there’s a very unequal service going on at the moment.” (20) Urban PCT, CSL15.  
24  
25  
26  
27  
28

29 For practitioners working in the acute sector there was an added sense of frustration as patients  
30 identified with UI on the wards could not be directly referred to the outpatients’ continence service on  
31 discharge, but had to be referred via their GP. Although this recommendation was included on the  
32 patients’ discharge letter, it was unsure as to whether or not this was acted upon by the patients’ GPs:  
33  
34  
35

36 “The key feature is for patients being referred in the first place, because I think that’s part of the problem  
37 is that they are not referred when they’ve seen somebody about their bladder problems or it’s been  
38 picked up on the ward. It’s not always seen as important.” (21) Acute Trust, CSL12.  
39  
40  
41  
42

43 **The reported lack of appropriate and timely referral to continence services may seem**  
44 **paradoxical to the high demands of these services by patients, as found in the previous**  
45 **theme. The lack of appropriate and timely referrals, however, may instead be a result of the**  
46 **high demand and subsequent long waiting lists.**  
47  
48  
49  
50

### 51 **Patient assessment**

52 A full patient assessment including complete history taking, physical examination, review of  
53 medication, urinary analysis, bladder scan, vaginal and rectal examination if appropriate, was seen by  
54 all participants as being a key feature of quality continence care for older patients, as this provided the  
55  
56  
57  
58  
59  
60

1  
2  
3 practitioner with the necessary information to make a differential diagnosis and to formulate an  
4  
5 individual treatment plan for each patient:

6 "You need to do a proper assessment so that you can actually make a nursing differential diagnosis,  
7  
8 refer if necessary, then make a proper treatment plan up for that individual and then follow them  
9  
10 through." (22) Urban PCT, CSL14.

11  
12  
13 Some participants also advocated implementing a more holistic assessment whereby patients were  
14  
15 seen in their own home:

16  
17 "We give a full holistic assessment so that we can see patients in their own home and look at their  
18  
19 facilities, mobility and things like that, which can quite often be part of the problem that they've got, so  
20  
21 it's more of a functional problem than anything else." (23) Urban PCT, CSL10.

22  
23  
24 The majority of participants reported that within their continence clinics they adhered to NICE  
25  
26 guidelines, which recommended that every patient is offered an assessment:

27  
28 "I think that we are following national policy quite well within the continence service. Every patient is  
29  
30 being offered a continence assessment by a suitably qualified member of the team." (24) Rural PCT,  
31  
32 CSL2.

33  
34 One participant, however, stated that they were under pressure from non-clinical managers to bypass  
35  
36 this process. Some of the participants also reported misgivings about the disparity in the quality and  
37  
38 thoroughness of the assessments being provided by ward nurses in hospital and by district nurses to  
39  
40 housebound patients and to nursing home residents who were unable to attend continence clinics:

41  
42 "The district nurses do what we would call basic assessments for us so they would see the patients that  
43  
44 have been referred to them, usually by the hospital if they've been discharged from secondary care, and  
45  
46 it's just basically a pad assessment." (25) Urban PCT, CSL10.

47  
48 "The district nurses who go to see the patients only assess for products. They don't look at the bigger  
49  
50 picture." (26) Urban PCT, CSL7.

## 51 52 **Continence education and specialist knowledge**

53  
54 Having a highly trained and knowledgeable workforce responsible for delivering high quality  
55  
56 continence care was identified by the majority of participants as being an essential feature of a quality  
57  
58

1  
2  
3 continence service for older people. Certainly all of the participants reported having at least one  
4  
5 specialist continence nurse on their team:

6  
7 "I think one of the key features [of the service] is to have a suitable trained nurse and a suitable team to  
8  
9 implement assessment and treatment as opposed to just products." (27) Urban PCT, CSL7.

10  
11  
12 In order to develop and improve the knowledge base and competency levels of their staff, all of the  
13  
14 participants recognised the importance of providing and attending on-going staff training programmes,  
15  
16 with one participant suggesting that education should be prioritised:

17  
18 "Training is an integral part of the service because obviously our service is with specialist nurses who  
19  
20 themselves access training and maintain their level of competence." (28) Urban PCT, CSL11.

21  
22  
23 All of the participants recognised and acknowledged that district nurses and other health care  
24  
25 professionals do not have the specialist skills and knowledge of the continence specialist nurse and  
26  
27 felt that access to training for these professionals was essential to promote continence and to raise  
28  
29 standards and parity in patient assessments:

30  
31 "I'd like to have more time with district nurses to bring up their level of continence assessment." (29)  
32  
33 Urban PCT, CSL8.

34  
35  
36 A wide range of training programmes was provided by the majority of participants for anyone involved  
37  
38 with looking after someone with continence problems. Some of the participants, however, revealed  
39  
40 that they had experienced difficulties in delivering these programmes to their targeted audiences due  
41  
42 to continence promotion not being recognised as a priority area by the trust and to staff shortages:

43  
44 "We've asked the question whether continence assessment training could be mandatory for district  
45  
46 nurses but the trust aren't too happy to do that at the moment. (30) Urban PCT, CSL16.

47  
48 We have a training programme but the unfortunate thing is that a lot of teams are very short-staffed so  
49  
50 being released from training is quite difficult." (31) Urban PCT, CSL3.

### 51 **Allocating the blame**

52  
53 **In addition to the six themes identified above, a seventh, cross-cutting theme emerged from**  
54  
55 **the analysis indicative of participants' tendency to see the blame for many of the barriers to a**  
56  
57 **good quality service as lying with other health professionals. Embedded within the quotations**  
58  
59  
60

1  
2  
3 provided above is a consistent apportioning of responsibility to, for example: GPs (quotes (1),  
4 (2), (18), (19)); commissioners (4); and district nurses ((12), (20), (25), (26)). When other health  
5 professionals are not identified as the main barrier to a good quality service, family carers  
6 and/or patients themselves are seen as part of the problem (quotes (3), (5), (6)). One can  
7 question, therefore, the veracity of the service leads' perspective, which may be informed, as  
8 per the tenets of attribution theory [30] by a self-serving bias in which the cause of problems is  
9 externalised, rather than acknowledging that the potential causes of poor service outcomes  
10 may be partly due to one's own behaviour (or in this current context, a group-serving bias  
11 might be operating in order to defend the credibility of one's own professional group [31]).  
12 Where specific groups of individuals are not pinpointed as creating problems, the issue of a  
13 lack of investment in capacity, training, infrastructure, etc., is presented as a further 'external'  
14 causative factors (investment in service capacity theme). With regard to facilitating positive  
15 developments within the service, there is some evidence within the data to suggest our  
16 participants see a role for themselves for positively influencing service development (e.g.,  
17 quotes (29),(30), (31)), although even here such developments are frustrated by external  
18 actors; and there is no indication of, for example, creative solutions for working with low  
19 resources. The continence service leads identify their positive impact on individual patient  
20 expectations (quote (8)), but notwithstanding that one participant saw it as a 'challenge [...] to  
21 try and persuade these staff there are things that can be done to help people and not just  
22 accept the problem.' (quote (1)), there is little evidence that the continence service leads saw  
23 themselves as responsible for advocating for a change of culture and practice around  
24 attitudes to older people and continence problems within the health service. This, despite  
25 their expressed perception that such is required.  
26  
27  
28  
29  
30  
31  
32  
33  
34  
35  
36  
37  
38  
39  
40  
41  
42  
43  
44  
45  
46  
47  
48  
49

## 50 DISCUSSION

51  
52 The aim of this study was to explore the views and experiences of continence service leads in  
53 England in order to identify and improve our understanding of barriers to a good quality service  
54 and potential facilitators to develop and improve services for older people with urinary  
55  
56  
57  
58  
59  
60



1  
2  
3 **incontinence (UI)**. Foremost among the issues raised by the continence service leads was a failure  
4 on the part of commissioners, managers and other health professionals in recognising the problem of  
5 UI and acknowledging the importance of continence for older people and the impact it has on other  
6 areas of health, such as quality of life, tissue viability and falls [32]. Indeed some continence service  
7 leads were highly critical of current commissioning practices which focused on purchasing pad  
8 provision rather than implementation of national guidelines, and feared that their continence services  
9 may not be recommissioned by their Clinical Commissioning Group after the 2013 National Health  
10 Service (NHS) in England reorganisation.  
11  
12  
13  
14  
15  
16  
17

18 **All participants posited that a positive attitude towards ageing and UI was a key factor**  
19 **in providing a good quality continence service and that a change in the current attitudes of**  
20 **commissioners and other health professionals towards UI and ageing was a key factor in**  
21 **improving continence services for older people with UI.** This perceived failure by commissioners  
22 and other health professionals in valuing the importance of continence promotion in older people may  
23 be indicative of both the low status of UI and implicit ageism. Ageism, defined as a process of  
24 systematic stereotyping of, and discrimination against, people because they are old [33], is evident  
25 amongst some doctors and other health care professionals and has been shown to impact negatively  
26 on the care older patients receive [34-38]. Taken at face value, our findings would indicate a need for  
27 change at the top level to ageist beliefs and attitudes about UI held by commissioners and other  
28 health professionals, to a standpoint that advocates candidacy for the treatment of older people with  
29 UI.  
30  
31  
32  
33  
34  
35  
36  
37  
38  
39  
40

41 There was consensus amongst the continence service leads that there needed to be  
42 investment in the development and implementation of integrated continence services to improve  
43 service quality and the patient experience. Results from earlier research suggest that integrated  
44 continence care in primary care improved the effectiveness of continence services and was  
45 associated with high patient satisfaction levels [39-42]. Although the National Service Framework  
46 (NSF) for Older People [14] required the establishment of integrated continence services for older  
47 people by April 2004 none of the continence service leads in this study worked in an integrated  
48 service. Indeed, findings from the latest national audit of continence care only reported four fully  
49 integrated continence services in England [20]. There would appear, therefore, to be a pressing need  
50  
51  
52  
53  
54  
55  
56  
57  
58  
59  
60

1  
2  
3 to adopt a more dynamic approach in the provision of continence services, whereby all practice  
4 professionals are involved in the prevention, recognition, assessment and treatment of UI  
5  
6  
7

8  
9 A lack of investment in service capacity was identified **by our participants** as being a key  
10 factor in failing to meet the increasing demand for continence services by older people. There may be  
11 some reservation in accepting the notion that a barrier to a good quality service is merely the  
12 provision of further resources, and certainly such an interpretation needs to be challenged given that  
13 there is little research evidence of a simple relationship between investment and quality services.  
14 However, our participants did not advocate a blanket increase in investment, rather investment  
15 targeted at certain perceived needs, such as in the need for more clinics, specialised equipment and  
16 staff (including staff training). Of interest is the fact that such resources were envisaged to reduce the  
17 gaps in local service provision and facilitate access to and availability of continence services. Despite  
18 National Guidelines there appears to be a “post code lottery” for continence services. In particular  
19 clinical leads from the rural PCTs felt that a failure by their Trusts to invest in clinical infrastructure had  
20 a negative impact on their ability to provide a local continence service, exacerbated by the lack of  
21 public transport and the long distances patients had to travel [43]. This interplay between  
22 organisational and geographical barriers to older people accessing health services in rural  
23 communities is well documented. [43, 44]. For rural continence services this interaction between  
24 organisation and geography was amplified by staff shortages, as most staff work part time, resulting in  
25 fewer clinics being held due to the length of time spent in travelling. A better understanding of the  
26 issues surrounding rural health would seem to be required by commissioners to ensure proofing of  
27 rural continence services, so as to identify and support the principles underpinning best practice.  
28  
29  
30  
31  
32  
33  
34  
35  
36  
37  
38  
39  
40  
41  
42

43 The delivery and implementation of a full continence assessment by highly trained individuals,  
44 together with continence promotion to every patient, regardless of age, were identified by all  
45 continence service leads as two of the key features of a high quality and effective service for older  
46 people with UI. The European Association of Urology guidelines on UI advocate that healthy older  
47 people should be offered a similar range of treatment options as younger people and that treatment  
48 should be individualised for frail older people [45]. Moreover, NICE guidelines specify that absorbent  
49 products are not a treatment of UI but rather should be used as: a coping strategy for patients  
50 awaiting definitive treatment; an add-on to on-going therapy; and long-term management of UI only  
51  
52  
53  
54  
55  
56  
57  
58  
59  
60

1  
2  
3 after other treatment options have been explored [19]. Our results, however, indicated a widespread  
4 feeling of frustration amongst the continence service leads at not being able to fulfil and realise all of  
5 the unmet needs for continence care services on account of patients not knowing what they want or  
6 what treatments they could have, inappropriate referrals by GPs and other health professionals and a  
7 lack of investment in service capacity, service integration and health professional education. The  
8 quality of continence assessments delivered to domiciliary and nursing home patients by district  
9 nurses and other health professionals, as opposed to continence nurse specialists, was also deemed  
10 to be an inferior key service characteristic which contributed to the disparity in the quality of care for  
11 older people with UI. Furthermore, in certain cases, this was compounded by GPs and other health  
12 professionals referring patients into the wrong service, delaying their referrals, or in extreme cases not  
13 referring patients at all to the continence service.

14  
15 At one level, the participants' identification of other health professionals as being 'part of the  
16 problem' with regard to the failure to deliver a high quality continence care service is borne out by  
17 evidence. For example, research indicates that GPs prefer to prescribe medications and pads due to  
18 a lack of faith in the efficacy of conservative treatment of U, and have a lack of knowledge of  
19 continence services [47-50]. Moreover, many GPs receive limited training and skills for the treatment  
20 and assessment of UI at both undergraduate and postgraduate levels [47, 49, 50] and have a  
21 substantial deficit in geriatric knowledge and training [47]. Likewise, findings from a recent nursing  
22 survey revealed gaps in nurse training and education for continence management, suggesting that  
23 nurses are not receiving sufficient support to assess and care for people with UI [51].

24  
25 **However, it is necessary to consider this 'pointing of the finger' as potentially due to**  
26 **other factors. Earlier we considered the self-serving bias for negative events to be attributed**  
27 **to external causes, but our findings could also be related to research on intergroup relations,**  
28 **which in general suggests that successful collaboration around a common purpose should**  
29 **lead to positive intergroup interactions, and less stringent group boundaries, whereas**  
30 **collaboration carried out under strained circumstances, and with less clarity around a**  
31 **common purpose, results in stronger in-group identification and more negative out-group**  
32 **perceptions [52]. Placed within the context of inter-professional working, it could be argued**  
33 **that status issues (e.g., medical versus nursing power within the National Health Service)**  
34 **might foster conditions whereby GPs refer directly to other medical services in acute**

1  
2  
3 hospitals; or that finite resources create the conditions for territorial disputes between  
4 'specialist' continence service leads and 'generalist' health professionals such as GPs and  
5 district nurses [53, 54].  
6  
7

8  
9         Nevertheless, if the level of frustration expressed by the continence service leads with  
10 the failing of fellow health professionals (and by extension the health service itself) reflects  
11 actual shortcomings, then one might understand why there seems within this group an  
12 apparent lack of initiative to effect real and significant improvements in service quality. If  
13 perceived control over the quality of their service is low, and this perception is enduring, then  
14 one might hypothesise the manifestation of a state of hopelessness whereby, no matter what  
15 one does, the anticipation is always of a negative outcome [55].  
16  
17  
18  
19  
20  
21  
22  
23  
24  
25

#### 26 Strengths and limitations

27  
28 This study only presents views on continence services from one perspective, that of service  
29 leads, and it is entirely true that this perspective may not in all respects correspond with the  
30 perspectives of, for example, GPs or commissioners. While comparison across different  
31 stakeholders would have been welcome, space restrictions would have precluded a detailed  
32 analysis of the perspective of a single stakeholder group as provided in this study. Further  
33 research is required to establish the perspectives of other stakeholder groups on the barriers  
34 to, and facilitators of, a quality continence care service. While there are always limits on the  
35 extent to which one can generalise the results of qualitative research, our findings have good face  
36 validity as the main themes identified in our analyses are reflected in relevant studies [56]. Our  
37 sampling strategy ensured a good representation of participants from across the range of former  
38 SHAs, while the use of qualitative interviews was the optimal method for this study as it allowed  
39 participants to discuss in detail and to express openly their opinions on the barriers to a successful  
40 service and how continence services for older people could be improved. Data were only collected  
41 in England as healthcare in Wales, Scotland and Northern Ireland is devolved and has no internal  
42 healthcare market, and so the study has a limited contribution to the debate on continence  
43 management in these areas of the UK.  
44  
45  
46  
47  
48  
49  
50  
51  
52  
53  
54  
55  
56  
57  
58  
59  
60

## CONCLUSION

From the perspective of continence service leads, patient assessment and continence promotion regardless of age, rather than pad provision, were identified as facilitators of the delivery of a **high quality service** for older people with UI, embedded within a change of attitudes to older people and UI among commissioners and other health professionals. More rapid and appropriate patient referral pathways, investment in service capacity, (including trained staff and facilities), strengthened inter-service collaborations and a higher profile for UI within medical and nursing training were specified as being important for delivering an equitable and high quality continence service. Further research is required to determine whether change within these identified priority areas may lead to the raising of standards in continence care for older people with UI. **There should, however, be concern that, overwhelmingly, the participants in our study identified problems in the delivery of a good quality continence care service as located within the behaviours and attitudes of other health professionals, the health service in general, or even family carers or patients themselves.** While potentially a true reflection of the situation, there is also an alternative interpretation that the pervasiveness of this blame allocation is at least partly due to our participants being members of a perceived low-status group within the NHS, who are treating a group of patients also perceived to be low-status – an issue highlighted by the participants themselves. Addressing this latter situation, while challenging, might be regarded as of foremost importance: not just in terms of its direct impact on improving service quality as suggested by our participants, but also in terms of its potential indirect impact in reducing inter-professional blame-allocation and empowering specialist continence nurses to effect meaningful change for themselves.

**FUNDING** Funding was received from the New Dynamics of Ageing Programme, led by the Economic & Social Research Council, UK (grant number RES-353-25-0010).

**COMPETING INTERESTS** None. All authors have completed the ICMJE uniform disclosure form at [icmje.org/coi\\_disclosure.pdf](http://icmje.org/coi_disclosure.pdf) (available on request from the corresponding author) and declare: no support from any organisation for the submitted work; no financial relationships with any organisations

1  
2  
3 that might have an interest in the submitted work in the previous three years; no other relationships or  
4  
5 activities that could appear to have influenced the submitted work.”  
6  
7  
8  
9  
10  
11  
12  
13  
14  
15  
16  
17  
18  
19  
20  
21  
22  
23  
24  
25  
26  
27  
28  
29  
30  
31  
32  
33  
34  
35  
36  
37  
38  
39  
40  
41  
42  
43  
44  
45  
46  
47  
48  
49  
50  
51  
52  
53  
54  
55  
56  
57  
58  
59  
60

For peer review only

## REFERENCES

1. Abrams P, Cardozo L, Fall M, et al. A. The standardisation of terminology in lower urinary tract function: report from the standardisation sub-committee of the International Continence Society. *Neurourol Urodyn* 2002;21:167-178.
2. Perry S, Shaw C, Assassa P, et al. An epidemiological study to establish the prevalence of urinary symptoms and felt need in the community: the Leicestershire MRC Incontinence Study. *J Pub Health Med* 2000;22(3):427-434.
3. McGrother CW, Donaldson MMK, Shaw C, et al. Storage symptoms of the bladder: prevalence, incidence and the need for services in the UK. *BJU Int* 2004;93:763-769.
4. DuBeau CE, Kuchel GA, Johnson II T, et al. *Neurourol Urodyn* 2010;29:165-178.
5. Drennan VM, Rait G, Cole L, et al. The prevalence of incontinence in people with cognitive impairment or dementia living at home: A Systematic review. *Neurourol Urodyn* 2013;32:314-324.
6. Debruyne FM, Heesakkers JP. Clinical and socioeconomic relevance of overactive bladder. *Urol* 2004;63:42-44.
7. Hunskaar S, Arnold EP, Burgio K, et al. Epidemiology and natural history of urinary incontinence. *Int Urogynecol J Pelvic Floor Dysfuncy* 2000;11(5):301-319.
8. Hunskaar S, Lose G, Sykes D, et al. The prevalence of urinary incontinence in women in four European countries. *BJU* 2004;93:324-330.
9. Bartoli S, Aguzzi G, Tarricone R. Impact on quality of life of urinary incontinence and overactive bladder: a systematic literature review. *Urol* 2010;745(3):491-500.
10. Thom DH, Haan MN, van den Eeden SK. Medically recognised urinary incontinence and the risks of hospitalisation, nursing home admission and mortality. *Age Ageing* 1997;26(5):367-374.
11. Coyne KS, Zhou Z, Thompson C et al. The impact of health-related quality of life of stress, urge and mixed urinary incontinence. *BJU Int* 2003;92(9):731-735.
12. Martin C, Williams C, O'Neill D. Retrospective analysis of attitudes to ageing in the *Economist*: apocalyptic demography for opinion formers? *BMJ* 2009;339:1435-1437.
13. Buckley BS, Lapitan MCM. Prevalence of urinary incontinence in men, women and children – current evidence: findings of the fourth international consultation on incontinence. *Urol* 2010;76(2):265-270.

- 1  
2  
3 14. Wagg A. Continence, incontinence and the ageing male. 2010.  
4  
5 [http://www.bgs.org.uk/index.php?option=com\\_content&view=article&id=242:continencecontinenc](http://www.bgs.org.uk/index.php?option=com_content&view=article&id=242:continencecontinenc)  
6  
7 [ewagg&catid=51:publications&itemid=147](http://www.bgs.org.uk/index.php?option=com_content&view=article&id=242:continencecontinenc)
- 8  
9 15. Irwin DE, Mungapen L, Milsom I, et al. The economic impact of overactive bladder syndrome in  
10  
11 six Western countries. *BJU Int* 2008;103(2):202-209.
- 12  
13 16. Mitteness LS, Barker JC. Stigmatizing a “normal” condition: urinary incontinence in late life. *Med*  
14  
15 *Anthropol Q* 1995;9(2):199-210.
- 16  
17 17. Fonda D, Abrams P. Cure sometimes, help always – A “Continence Paradigm” for all ages and  
18  
19 conditions. *Neurourol Urodyn* 2006;25:290-292.
- 20  
21 18. Martin JL, Williams KS, Abrams AS, et al. Systematic review and evaluation of methods of  
22  
23 assessing urinary incontinence. *HTA* 2006;10(6):1-4.
- 24  
25 19. NICE CG 40 Urinary incontinence in women 2006 <http://guidance.nice.org.uk/CG40>
- 26  
27 20. Royal College of Physicians National Audit of Continence Care 2010  
28  
29 <http://www.rcplondon.ac.uk/resources/national-audit-continence-care>
- 30  
31 21. Teddlie C, Yu F. Mixed methods sampling: a typology with examples. *J Mixed Methods Res*  
32  
33 2007;1:77-100.
- 34  
35 22. Department of Health. Good practice incontinence services. HMSO:London, 2000.
- 36  
37 23. Department of Health. National service framework for older people. HMSO:London, 2001.
- 38  
39 24. Ritchie J, Spencer L. Qualitative data analysis for applied research policy. In: A Bayman, RG  
40  
41 Burgess (eds.), *Analysing Qualitative Data*, London: Routledge, 1993, pp. 173-194.
- 42  
43 25. Ward DJ, Furber C, Tierney S. Using Framework Analysis in nursing research: a worked  
44  
45 example. *J Advanced Nurs* 2013 doi: 10.1111/jan.12127
- 46  
47 26. Lacey A, Luff D. Qualitative data analysis 2007 [www.rds-yh.nihr.ac.uk](http://www.rds-yh.nihr.ac.uk)
- 48  
49 27. Pope C, Ziebland S, Mays N. Qualitative research in health care. *BMJ* 2000;320:114-116.
- 50  
51 28. Guest G, Bunce A, Johnson L. How many interviews are enough? An experiment with Data  
52  
53 Saturation and Variability. *Field Methods* 2006;18:59-82.
- 54  
55 29. Francis JJ, Johnston M, Robertson C, et al. What is adequate sample size? Operationalising  
56  
57 data saturation for theory-based interview studies. *Psychol Health* 2010;25:1229-1245.
- 58  
59 30. Zuckerman M. Attribution of success and failure revisited, or: the motivational bias is alive and  
60  
well in attribution theory. *J Personality* 1979;47:245-87.



- 1  
2  
3 31. Hewston M. The 'ultimate attribution error'. A review of the literature on intergroup causal  
4 attribution. *Eur J Soc Psychol* 1990;20:311-35.
- 5  
6 32. Foley AL, Loharuka S, Barrett JA, et al. Association between the geriatric giants of urinary  
7 incontinence and falls in older people using data from the Leicestershire MRC incontinence study.  
8 *Age Ageing* 2012;41:35-40.
- 9  
10 33. Cohen E. The complex nature of ageism: what is it? Who does it? Who perceives it? *Gerontol*  
11 2001;41:576-577.
- 12  
13 34. Lothian K, Philip I. Maintaining the dignity and autonomy of older people in the healthcare setting.  
14 *BMJ* 2001;322:668-670.
- 15  
16 35. Gunderson A, Tomkpwiak J, Menachemi N, et al. Rural physicians' attitudes towards the elderly:  
17 evidence of ageism? *Q Manage Health Care* 2005; 14:167-176.
- 18  
19 36. Gallagher S, Bennett KM, Halford JCG. A comparison of acute and long-term health-care  
20 personnel's attitudes towards older adults. *Int J Nurs Pract* 2006;12:273-279.
- 21  
22 37. Leung S, Lo Giudice D, Schwarz J, et al. Hospital doctors' attitudes towards older people. *Int*  
23 *Med J* 2011;41:308-314.
- 24  
25 38. Courtney M, Tong S, Walsh A. Acute-care nurses' attitudes towards older patients: a literature  
26 review. *Int J Nurs Pract* 2000;6:62-69.
- 27  
28 39. Wagg A, Lowe D, Peel P, Potter J. Do self-reported 'integrated' continence services provide high  
29 quality continence care? *Age Ageing* 2009;38(6):730-733.
- 30  
31 40. Bayliss V, Salter L. Pathways for evidence-based continence care. *Nurs Stand* 2004;19:45-51.
- 32  
33 41. Williams K, Assassa R, Cooper N, Turner D, Shaw C, Abrams K, et al. Clinical and cost-  
34 effectiveness of a new nurse-led continence service: a randomised controlled trial. *Br J Gen*  
35 *Pract* 2005;55:696-703.
- 36  
37 42. Jha S, Moran P, Blackwell A, et al. Integrated care pathways: The way forward for continence  
38 services? *Euro J Obs Gynecol Repo Biol* 2007;134:120-125.
- 39  
40 43. Mungall I. Trend towards centralisation of hospital services and its effects on access to care for  
41 rural and remote communities in the UK. *Rural Remote Health* 2005;5(2):390.
- 42  
43 44. European Commission. Quality in and equality of access to healthcare. European Commission  
44 2008.

- 1  
2  
3 45. Commission for Healthcare Audit and Inspection. Living well in later life. A review of progress  
4 against national standard framework for older people 2006.  
5  
6  
7 46. Schroder A, Abrams P, Andersson K-E, et al. Guidelines on urinary incontinence. European  
8 Association of Urology 2009.  
9  
10 47. Grealish M, O'Dowd TC. General practitioners and women with urinary incontinence. Br J GP  
11 1998;48:975-978.  
12  
13 48. Shaw C, Atwell C, Wood F, Brittain K, Williams K. A qualitative study of the assessment and  
14 treatment of incontinence in primary care. Fam Pract 2007;24:461-467.  
15  
16 49. Gerrits M, Avery T, Largo-Janssen ALM. Urinary incontinence management in women: audit in  
17 general practice. J Eval Clin Pract 2008;14:836-838.  
18  
19 50. van Gerwen M, Schellevis F, Lagro-Janssen A. Management of urinary incontinence in general  
20 practice: data from the second Dutch national survey. J Eval Clin Pract 2009;15:341-345.  
21  
22 51. Nursing Times Survey 2009 [http://www.nursingtimes.net/nurses-must-receive-sufficient-](http://www.nursingtimes.net/nurses-must-receive-sufficient-continenence-education-and-training/5001846.article)  
23 [continenence-education-and-training/5001846.article](http://www.nursingtimes.net/nurses-must-receive-sufficient-continenence-education-and-training/5001846.article)  
24  
25  
26  
27  
28 52. Brown RJ, Wade GS. Superordinate goals and intergroup behaviour: the effects of role ambiguity  
29 and status on intergroup attitudes and task performance. Eur J Soc Psychol 1987;17:131-142.  
30  
31 53. Abbot A. 1988. The system of professions. An essay on the division of expert labor. Chicago:  
32 University of Chicago Press.  
33  
34 54. Hughes E. 1993. Licence and mandate. In Walmsley, J. et al. (eds.) Health, welfare and practice.  
35 Reflecting on roles and relationships (pp. 21-24). London:Sage.  
36  
37 55. Abramson L Y, Metalsky G I, Alloy LB. (1989). Hopelessness depression: A theory-based  
38 subtype of depression. Psychol Rev 1989;96:358-372.  
39  
40 56. Cheater FM. Overcoming the barriers to optimum continence care: the need for an expanded  
41 approach to implementation. Int J Older People Nurs 2009;4:70-75.  
42  
43  
44  
45  
46  
47  
48  
49  
50  
51  
52  
53  
54  
55  
56  
57  
58  
59  
60

1  
2  
3  
4  
5  
6  
7  
8  
9  
10  
11  
12  
13  
14  
15  
16  
17  
18  
19  
20  
21  
22  
23  
24  
25  
26  
27  
28  
29  
30  
31  
32  
33  
34  
35  
36  
37  
38  
39  
40  
41  
42  
43  
44  
45  
46  
47  
48  
49  
50  
51  
52  
53  
54  
55  
56  
57  
58  
59  
60

For peer review only
